# Supplementary material for: Proteomic Analysis of Domestic Cat Blastocysts and Their Secretome Produced in an In Vitro Culture System without the Presence of the Zona Pellucida
Source: MDPI journal article supplement (doi:10.3390/ijms25084343), 2024-04-14
Supplement: s1 [file s1]

# Proteomic Analysis of Domestic Cat Blastocysts and Their Secretome Produced in an In Vitro Culture System without the Presence of the Zona Pellucida

Daniel Veraguas-Dávila <sup>1,2,\*</sup>, Camila Zapata-Rojas <sup>2</sup>, Constanza Aguilera <sup>3</sup>, Darling Saéz-Ruiz <sup>2</sup>, Fernando Saravia <sup>2</sup>, Fidel Ovidio Castro <sup>2</sup> and Lleretny Rodriguez-Alvarez <sup>2</sup>

<sup>1</sup> Escuela de Medicina Veterinaria, Departamento de Ciencias Agrarias, Facultad de Ciencias Agrarias y Forestales, Universidad Católica del Maule, Km 6 Los Niches, Curicó 3340000, Chile

<sup>2</sup> Department of Animal Science, Faculty of Veterinary Sciences, Universidad de Concepción, Av. Vicente Méndez 595, Chillan 3780000, Chile; mv.camilazapatarojas@gmail.com (C.Z.-R.); darlin.saez.r@gmail.com (D.S.-R.); fsaravia@udec.cl (F.S.); fidcastro@udec.cl (F.O.C.); llrodriguez@udec.cl (L.R.-A.)

<sup>3</sup> School of Veterinary Medicine, Faculty of Natural Sciences, San Sebastián University, Concepción 4081339, Chile; constanza.aguilera@uss.cl

\* Correspondence: dveraguas@ucm.cl or daniveraguasdv@gmail.com

## Supplementary files

|                                                                                                                |       |
|----------------------------------------------------------------------------------------------------------------|-------|
| <b>S1. Principal component analysis (PCA)</b> .....                                                            | 2     |
| <b>S2. Quantifiable proteins of ZF and ZI blastocysts</b> .....                                                | 3-8   |
| <b>S3. Detailed functional annotation of DEPs of blastocysts</b> .....                                         | 9-11  |
| <b>S3.1-6. GO of proteins of ZF blastocysts (S3.1, S3.2, S3.3) and ZI blastocysts (S3.4, S3.5, S3.6)</b> ..... | 12-17 |
| <b>S4. Proteins identified in the culture medium of blastocysts from the ZF and ZI groups</b> ...              | 18-19 |
| <b>S5. GO annotation of the proteins identified in the culture</b> .....                                       | 20-23 |
| <b>S6. Detailed functional annotation of proteins identified in conditioned medium</b> .....                   | 24-26 |

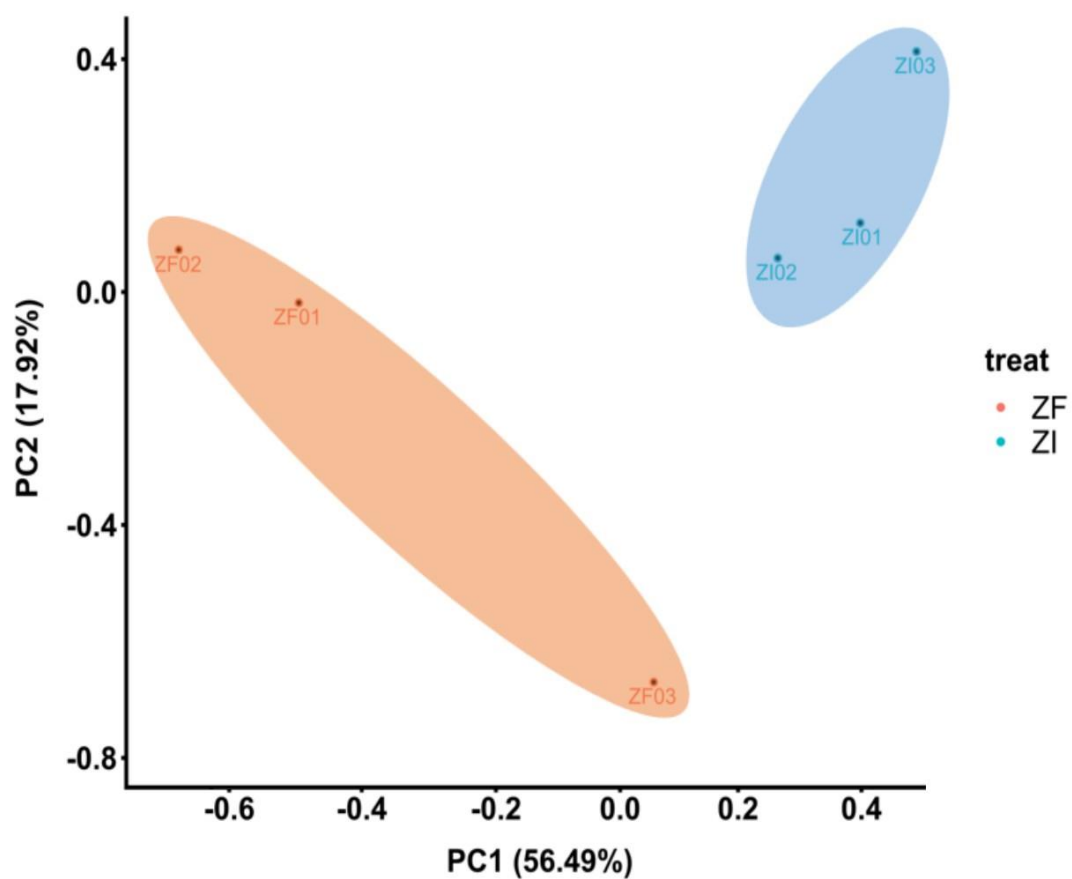

**Figure S1. Principal component analysis (PCA).** PCA of the total proteins detected in each replicate from the ZF (ZF01, ZF02 and ZF03) and ZI (ZI01, ZI02 and ZI03). The PCA shows clusters of expressed proteins that differ across the samples.

**Table S2. Quantifiable proteins of ZF and ZI blastocysts.** Quantifiable proteins identified in domestic cat blastocysts from the ZF and ZI groups. Differentially expressed proteins (DEPs)  $P < 0.05$ .

|    | Protein (ID)                | Log2FC      | P. Value   |
|----|-----------------------------|-------------|------------|
| 1  | M3VZQ3 M3VZQ3_FELCA         | 3.17734479  | 8.8332E-05 |
| 2  | A0A337SVF6 A0A337SVF6_FELCA | -2.81974135 | 0.00076552 |
| 3  | A0A2I2UXE2 A0A2I2UXE2_FELCA | -2.65692623 | 0.00244662 |
| 4  | A0A2I2U1C5 A0A2I2U1C5_FELCA | 3.98060042  | 0.00311181 |
| 5  | M3WCZ9 M3WCZ9_FELCA         | -2.25459988 | 0.00357124 |
| 6  | A0A5F5XCJ6 A0A5F5XCJ6_FELCA | -2.11846902 | 0.00388714 |
| 7  | M3WHX6 M3WHX6_FELCA         | -1.74681032 | 0.00401573 |
| 8  | A0A337SCY3 A0A337SCY3_FELCA | -1.9626275  | 0.00586399 |
| 9  | A0A2I2UZM2 A0A2I2UZM2_FELCA | 1.95964111  | 0.00625748 |
| 10 | A0A2I2U221 A0A2I2U221_FELCA | 2.23313259  | 0.00612021 |
| 11 | A0A337SW00 A0A337SW00_FELCA | -2.0509994  | 0.00760704 |
| 12 | A0A2I2UXE4 A0A2I2UXE4_FELCA | 2.31927503  | 0.00962896 |
| 13 | M3VYI7 M3VYI7_FELCA         | 2.71239201  | 0.00899639 |
| 14 | M3VX46 M3VX46_FELCA         | 1.61502009  | 0.01107067 |
| 15 | A0A337S6R5 A0A337S6R5_FELCA | 2.42297848  | 0.01078582 |
| 16 | M3W9Y8 M3W9Y8_FELCA         | 2.01100493  | 0.01179752 |
| 17 | M3WAW0 M3WAW0_FELCA         | -1.48787899 | 0.01293448 |
| 18 | A0A5F5XWX3 A0A5F5XWX3_FELCA | -1.82092779 | 0.01365135 |
| 19 | A0A5F5XQQ6 A0A5F5XQQ6_FELCA | -1.9562502  | 0.01636457 |
| 20 | M3WCX7 M3WCX7_FELCA         | 1.87232765  | 0.01809163 |
| 21 | A0A5F5Y0Y9 A0A5F5Y0Y9_FELCA | 1.89221244  | 0.01811358 |
| 22 | A0A2I2UL05 A0A2I2UL05_FELCA | -1.5655253  | 0.01909538 |
| 23 | M3VW27 M3VW27_FELCA         | -1.46532    | 0.01962583 |
| 24 | M3WD17 M3WD17_FELCA         | -1.36580332 | 0.0206993  |
| 25 | A0A337SJ9 A0A337SJ9_FELCA   | 1.42487437  | 0.02292737 |
| 26 | M3W1X7 M3W1X7_FELCA         | -1.60814943 | 0.02304837 |
| 27 | A0A5F5XWD4 A0A5F5XWD4_FELCA | 2.23313382  | 0.02424332 |
| 28 | M3W9X1 M3W9X1_FELCA         | 3.21413703  | 0.02400918 |
| 29 | A0A2I2UMD6 A0A2I2UMD6_FELCA | 1.48842654  | 0.02362781 |
| 30 | M3X4Y3 M3X4Y3_FELCA         | -1.32858383 | 0.02750559 |
| 31 | M3WFT4 M3WFT4_FELCA         | 1.34473579  | 0.02860092 |
| 32 | M3WDF5 M3WDF5_FELCA         | -1.44449596 | 0.03319027 |
| 33 | Q66RN5 EF1A1_FELCA          | 1.51020066  | 0.03705747 |
| 34 | M3WVC7 M3WVC7_FELCA         | 1.35282905  | 0.04453224 |
| 35 | A0A5F5XYM1 A0A5F5XYM1_FELCA | -2.29930597 | 0.03963366 |
| 36 | A0A2I2U7Z5 A0A2I2U7Z5_FELCA | 1.60935135  | 0.0440415  |
| 37 | M3WIA4 M3WIA4_FELCA         | -1.28571479 | 0.04705984 |
| 38 | A0A2I2V068 A0A2I2V068_FELCA | -1.35619626 | 0.04892405 |
| 39 | M3WJL8 M3WJL8_FELCA         | 1.29586264  | 0.04988445 |
| 40 | M3WRT2 M3WRT2_FELCA         | 2.0962291   | 0.04569637 |

|    |                             |             |            |
|----|-----------------------------|-------------|------------|
| 41 | M3W9D5 M3W9D5_FELCA         | -1.20664542 | 0.04717624 |
| 42 | A0A337S416 A0A337S416_FELCA | 1.3425531   | 0.04971628 |
| 43 | M3WJZ7 M3WJZ7_FELCA         | -1.28876733 | 0.05618766 |
| 44 | M3W6H0 M3W6H0_FELCA         | -1.51076432 | 0.05877985 |
| 45 | A0A2I2U4B2 A0A2I2U4B2_FELCA | -1.21562436 | 0.06292421 |
| 46 | A0A5F5Y5E1 A0A5F5Y5E1_FELCA | -1.94225307 | 0.06737603 |
| 47 | M3X1T7 M3X1T7_FELCA         | 2.8291405   | 0.07447896 |
| 48 | A0A5F5XQT3 A0A5F5XQT3_FELCA | -1.03582209 | 0.06176732 |
| 49 | M3W6X3 M3W6X3_FELCA         | 1.11369034  | 0.06106935 |
| 50 | M3WXV4 M3WXV4_FELCA         | 1.14585085  | 0.07820449 |
| 51 | M3WRZ7 M3WRZ7_FELCA         | 1.19497296  | 0.07464491 |
| 52 | A0A5F5XFM1 A0A5F5XFM1_FELCA | -1.32299395 | 0.08053958 |
| 53 | A0A2I2UNG3 A0A2I2UNG3_FELCA | 1.76317592  | 0.07434401 |
| 54 | M3XDX6 M3XDX6_FELCA         | -1.11660959 | 0.07863656 |
| 55 | A0A337SQQ5 A0A337SQQ5_FELCA | -1.30598621 | 0.0871821  |
| 56 | A0A2I2UD00 A0A2I2UD00_FELCA | -1.18176787 | 0.08979881 |
| 57 | A0A2I2UUV9 A0A2I2UUV9_FELCA | 1.09493502  | 0.09261486 |
| 58 | A0A5F5XM88 A0A5F5XM88_FELCA | -1.33422208 | 0.08927905 |
| 59 | A0A5F5XNM3 A0A5F5XNM3_FELCA | -0.94863444 | 0.07606561 |
| 60 | M3WUL6 M3WUL6_FELCA         | 1.24481136  | 0.09206694 |
| 61 | A0A337RZN8 A0A337RZN8_FELCA | 1.01758194  | 0.09952202 |
| 62 | A0A2I2U5M9 A0A2I2U5M9_FELCA | 1.01501299  | 0.10796034 |
| 63 | A0A2I2UQ30 A0A2I2UQ30_FELCA | -1.10497045 | 0.1026632  |
| 64 | M3W6N1 M3W6N1_FELCA         | -0.87423562 | 0.09685437 |
| 65 | M3WRM0 M3WRM0_FELCA         | -0.95478767 | 0.12936561 |
| 66 | M3W103 M3W103_FELCA         | -1.1497569  | 0.12663303 |
| 67 | A0A337SKJ9 A0A337SKJ9_FELCA | -0.88254023 | 0.1291582  |
| 68 | M3XAK5 M3XAK5_FELCA         | -0.93351261 | 0.12121576 |
| 69 | M3VVI7 M3VVI7_FELCA         | 0.88137742  | 0.12709696 |
| 70 | A0A337SU81 A0A337SU81_FELCA | -2.42330235 | 0.12053453 |
| 71 | M3WQJ0 M3WQJ0_FELCA         | -0.955751   | 0.11180913 |
| 72 | A0A2I2UIR6 A0A2I2UIR6_FELCA | -1.43879033 | 0.13210278 |
| 73 | A0A337SGK3 A0A337SGK3_FELCA | -0.97457468 | 0.13432965 |
| 74 | A0A337S2X4 A0A337S2X4_FELCA | 1.45180618  | 0.12727104 |
| 75 | M3VWC7 M3VWC7_FELCA         | -2.8404019  | 0.11667173 |
| 76 | A0A2I2V1C1 A0A2I2V1C1_FELCA | -2.50453648 | 0.13117932 |
| 77 | M3XE20 M3XE20_FELCA         | 1.18236665  | 0.13884542 |
| 78 | M3VW05 M3VW05_FELCA         | 0.87555343  | 0.15495318 |
| 79 | A0A337SDT4 A0A337SDT4_FELCA | -0.94151244 | 0.14172712 |
| 80 | M3W340 M3W340_FELCA         | 1.00393666  | 0.15457413 |
| 81 | M3WWP2 M3WWP2_FELCA         | 1.0519005   | 0.1552471  |
| 82 | M3W1E8 M3W1E8_FELCA         | -0.71424771 | 0.13951312 |
| 83 | M3WMR1 M3WMR1_FELCA         | -0.98450477 | 0.14937222 |
| 84 | A0A337SJM7 A0A337SJM7_FELCA | 1.430515    | 0.16597559 |
| 85 | D3U660 D3U660_FELCA         | -0.89811593 | 0.17749818 |

|     |                             |             |            |
|-----|-----------------------------|-------------|------------|
| 86  | A0A337RXE8 A0A337RXE8_FELCA | 1.39230122  | 0.17120384 |
| 87  | M3WFR2 M3WFR2_FELCA         | 0.74858779  | 0.16297069 |
| 88  | A0A5F5Y0E9 A0A5F5Y0E9_FELCA | 0.87421188  | 0.16993118 |
| 89  | M3W8D3 M3W8D3_FELCA         | -1.11652385 | 0.19614802 |
| 90  | M3W6N3 M3W6N3_FELCA         | -0.84229759 | 0.20542554 |
| 91  | A0A337STW1 A0A337STW1_FELCA | -1.18300428 | 0.19807428 |
| 92  | A0A337SK34 A0A337SK34_FELCA | -0.71507341 | 0.1977503  |
| 93  | A0A337SEI8 A0A337SEI8_FELCA | 0.83705413  | 0.187847   |
| 94  | A0A5F5XJ28 A0A5F5XJ28_FELCA | 1.0281029   | 0.20696765 |
| 95  | M3XCN6 M3XCN6_FELCA         | 0.74630243  | 0.18057895 |
| 96  | M3VVN9 M3VVN9_FELCA         | -1.91235804 | 0.18946062 |
| 97  | M3W5B5 M3W5B5_FELCA         | 1.15469796  | 0.19471384 |
| 98  | M3WIJ6 M3WIJ6_FELCA         | 0.85896043  | 0.19457348 |
| 99  | M3WZB0 M3WZB0_FELCA         | 0.79449334  | 0.20071081 |
| 100 | M3WIY9 M3WIY9_FELCA         | 0.68731582  | 0.21730774 |
| 101 | A0A2I2U4U9 A0A2I2U4U9_FELCA | -0.6948812  | 0.23504809 |
| 102 | M3XAB2 M3XAB2_FELCA         | -0.63181561 | 0.21039822 |
| 103 | M3WEG0 M3WEG0_FELCA         | 0.73614418  | 0.21328651 |
| 104 | A0A337S1C3 A0A337S1C3_FELCA | -0.61691418 | 0.19212901 |
| 105 | A0A337S574 A0A337S574_FELCA | -0.87744834 | 0.22741398 |
| 106 | A0A2I2U5B1 A0A2I2U5B1_FELCA | 0.6893842   | 0.23889908 |
| 107 | M3WES0 M3WES0_FELCA         | 1.33559327  | 0.24972994 |
| 108 | A0A5F5XZJ4 A0A5F5XZJ4_FELCA | 0.68525792  | 0.27332331 |
| 109 | A0A2I2V4V0 A0A2I2V4V0_FELCA | -1.22412716 | 0.25283299 |
| 110 | M3W0Z9 M3W0Z9_FELCA         | 1.25556378  | 0.25675866 |
| 111 | M3WXZ4 M3WXZ4_FELCA         | 0.74101269  | 0.23774364 |
| 112 | M3W0S1 M3W0S1_FELCA         | -0.74563497 | 0.18870746 |
| 113 | M3W314 M3W314_FELCA         | 0.63825065  | 0.25602845 |
| 114 | M3W616 M3W616_FELCA         | -1.61546534 | 0.24485034 |
| 115 | M3WFE1 M3WFE1_FELCA         | 0.84877822  | 0.19648222 |
| 116 | M3W6I2 M3W6I2_FELCA         | -0.7070366  | 0.24716385 |
| 117 | M3XFH0 M3XFH0_FELCA         | 0.89905949  | 0.25148967 |
| 118 | M3WG78 M3WG78_FELCA         | 0.69794975  | 0.26145728 |
| 119 | A0A5F5XXV6 A0A5F5XXV6_FELCA | -0.72392569 | 0.30454032 |
| 120 | A0A337S6S4 A0A337S6S4_FELCA | 0.60932632  | 0.26272722 |
| 121 | A0A2I2V257 A0A2I2V257_FELCA | 0.65866376  | 0.26273789 |
| 122 | A0A5F5XLI3 A0A5F5XLI3_FELCA | -1.20921034 | 0.30052652 |
| 123 | M3X673 M3X673_FELCA         | 1.29524112  | 0.29625437 |
| 124 | A0A0A0MPX9 A0A0A0MPX9_FELCA | 0.56673339  | 0.2935787  |
| 125 | A0A2I2UFN5 A0A2I2UFN5_FELCA | 0.5739124   | 0.345949   |
| 126 | A0A5F5XTM3 A0A5F5XTM3_FELCA | -0.77298411 | 0.30682978 |
| 127 | M3VWM9 M3VWM9_FELCA         | -0.73283126 | 0.37583264 |
| 128 | A0A5F5XI95 A0A5F5XI95_FELCA | -0.69785452 | 0.33005281 |
| 129 | M3VX06 M3VX06_FELCA         | -0.63290582 | 0.40177814 |
| 130 | A0A337S0E1 A0A337S0E1_FELCA | -1.59264676 | 0.35190383 |

|     |                             |             |            |
|-----|-----------------------------|-------------|------------|
| 131 | M3W8Q7 M3W8Q7_FELCA         | 0.54243869  | 0.40418621 |
| 132 | M3X7Z9 M3X7Z9_FELCA         | 0.63226259  | 0.40663471 |
| 133 | A0A337SBS4 A0A337SBS4_FELCA | 0.61730868  | 0.36518077 |
| 134 | A0A5F5XDM3 A0A5F5XDM3_FELCA | -1.04796814 | 0.38457297 |
| 135 | A0A2I2V2E9 A0A2I2V2E9_FELCA | -0.54045608 | 0.37838812 |
| 136 | M3WN96 M3WN96_FELCA         | -0.97199818 | 0.39857618 |
| 137 | A0A337S5W7 A0A337S5W7_FELCA | -0.6470899  | 0.44761128 |
| 138 | A0A337SKI4 A0A337SKI4_FELCA | 0.79674309  | 0.42717936 |
| 139 | A0A2I2V256 A0A2I2V256_FELCA | -1.21278287 | 0.41387961 |
| 140 | A0A5F5XE26 A0A5F5XE26_FELCA | 0.72716569  | 0.40729381 |
| 141 | M3WM64 M3WM64_FELCA         | 0.78744828  | 0.44932791 |
| 142 | A0A5F5XVC1 A0A5F5XVC1_FELCA | -0.74508586 | 0.45003252 |
| 143 | A0A2I2UP60 A0A2I2UP60_FELCA | 0.48528117  | 0.39241787 |
| 144 | M3VY74 M3VY74_FELCA         | -0.51296096 | 0.48588117 |
| 145 | M3W9U6 M3W9U6_FELCA         | -1.00312623 | 0.46131722 |
| 146 | A0A2I2UG69 A0A2I2UG69_FELCA | 0.66929167  | 0.49381499 |
| 147 | M3VY56 M3VY56_FELCA         | -0.53077197 | 0.51477886 |
| 148 | A0A2I2UNB8 A0A2I2UNB8_FELCA | -0.39333699 | 0.44012135 |
| 149 | A0A337SAA8 A0A337SAA8_FELCA | -1.15669399 | 0.4616709  |
| 150 | M3VWY7 M3VWY7_FELCA         | 0.54230663  | 0.41443626 |
| 151 | M3WNV1 M3WNV1_FELCA         | 0.6966889   | 0.49031456 |
| 152 | A0A2I2UJE2 A0A2I2UJE2_FELCA | 0.66064069  | 0.4133928  |
| 153 | A0A5F5XQH4 A0A5F5XQH4_FELCA | 0.5550161   | 0.43508366 |
| 154 | M3WGE6 M3WGE6_FELCA         | 0.74753285  | 0.41061425 |
| 155 | M3X2Q9 M3X2Q9_FELCA         | -0.4897043  | 0.48225859 |
| 156 | A0A2I2U902 A0A2I2U902_FELCA | 0.73084154  | 0.53015201 |
| 157 | A0A2I2UDQ5 A0A2I2UDQ5_FELCA | 0.55171635  | 0.49419813 |
| 158 | M3W7N2 M3W7N2_FELCA         | 0.47614104  | 0.415903   |
| 159 | A0A5F5XE84 A0A5F5XE84_FELCA | 0.5693967   | 0.43053054 |
| 160 | M3VV33 M3VV33_FELCA         | -0.43455161 | 0.42186376 |
| 161 | A0A2I2UHR0 A0A2I2UHR0_FELCA | 0.55252544  | 0.50489897 |
| 162 | A0A2I2V2I3 A0A2I2V2I3_FELCA | -0.84502585 | 0.55533422 |
| 163 | M3WSM7 M3WSM7_FELCA         | 0.55817512  | 0.47007981 |
| 164 | M3VX55 M3VX55_FELCA         | 0.4155886   | 0.47936794 |
| 165 | M3XCQ1 M3XCQ1_FELCA         | -0.46820336 | 0.47874947 |
| 166 | A0A337SFA0 A0A337SFA0_FELCA | 0.5220583   | 0.50596542 |
| 167 | M3WU44 M3WU44_FELCA         | -0.5840467  | 0.40386813 |
| 168 | A0A337S2D3 A0A337S2D3_FELCA | 0.27982289  | 0.65995173 |
| 169 | A0A337S266 A0A337S266_FELCA | -0.43491997 | 0.59816099 |
| 170 | P63052 RL40_FELCA           | 0.40760661  | 0.45350201 |
| 171 | M3VZE2 M3VZE2_FELCA         | 0.45272905  | 0.53028123 |
| 172 | M3VYQ2 M3VYQ2_FELCA         | 0.34418969  | 0.48789018 |
| 173 | A0A5F5XEX8 A0A5F5XEX8_FELCA | -0.42198273 | 0.56543779 |
| 174 | M3W484 M3W484_FELCA         | -0.31737862 | 0.71123519 |
| 175 | M3WAQ4 M3WAQ4_FELCA         | 0.41428386  | 0.59670788 |

|     |                             |             |            |
|-----|-----------------------------|-------------|------------|
| 176 | M3X6Y9 M3X6Y9_FELCA         | -0.5272906  | 0.70475752 |
| 177 | A0A2I2U0U0 A0A2I2U0U0_FELCA | 0.49135937  | 0.66422395 |
| 178 | A0A2I2UD94 A0A2I2UD94_FELCA | -0.27499601 | 0.74736059 |
| 179 | M3X8C2 M3X8C2_FELCA         | 0.27777717  | 0.68644143 |
| 180 | M3WFX6 M3WFX6_FELCA         | 0.34794819  | 0.70357863 |
| 181 | A0A2I2U4W2 A0A2I2U4W2_FELCA | 0.46827761  | 0.50778625 |
| 182 | M3WGK3 M3WGK3_FELCA         | -0.35853682 | 0.49388268 |
| 183 | M3XB84 M3XB84_FELCA         | -0.54178942 | 0.5353923  |
| 184 | M3WLH5 M3WLH5_FELCA         | -0.15826925 | 0.81602143 |
| 185 | A0A337S2E2 A0A337S2E2_FELCA | -0.23048676 | 0.71707321 |
| 186 | A0A337SAT1 A0A337SAT1_FELCA | -0.40752042 | 0.54197182 |
| 187 | M3WAB5 M3WAB5_FELCA         | 0.14051258  | 0.84858983 |
| 188 | M3VXZ1 M3VXZ1_FELCA         | 0.30650203  | 0.66882377 |
| 189 | A0A5F5XKD4 A0A5F5XKD4_FELCA | 0.16216635  | 0.78687204 |
| 190 | P61246 RS3A_FELCA           | -0.42039794 | 0.54178873 |
| 191 | M3X3M7 M3X3M7_FELCA         | -0.4027443  | 0.82418817 |
| 192 | M3VXE9 M3VXE9_FELCA         | 0.48421677  | 0.5614932  |
| 193 | M3VVZ2 M3VVZ2_FELCA         | 0.07473626  | 0.94205655 |
| 194 | A0A2I2UFE0 A0A2I2UFE0_FELCA | 0.19756537  | 0.78368149 |
| 195 | M3XCH0 M3XCH0_FELCA         | 0.33154207  | 0.69930009 |
| 196 | M3WAZ1 M3WAZ1_FELCA         | 0.0688818   | 0.95978421 |
| 197 | M3WY95 M3WY95_FELCA         | 0.34809153  | 0.61956759 |
| 198 | M3X2J1 M3X2J1_FELCA         | 0.38207968  | 0.55067371 |
| 199 | A0A2I2UWM9 A0A2I2UWM9_FELCA | 0.05780446  | 0.9254989  |
| 200 | A0A2I2U1M4 A0A2I2U1M4_FELCA | 0.47114034  | 0.61481224 |
| 201 | M3VUH3 M3VUH3_FELCA         | -0.08414469 | 0.94342427 |
| 202 | A0A5F5XKM9 A0A5F5XKM9_FELCA | -0.241069   | 0.65125065 |
| 203 | A0A2I2URI6 A0A2I2URI6_FELCA | -0.60474723 | 0.69245125 |
| 204 | M3W668 M3W668_FELCA         | 0.24647312  | 0.66201051 |
| 205 | A0A2I2U5K7 A0A2I2U5K7_FELCA | -0.20079229 | 0.71490421 |
| 206 | A0A2I2V460 A0A2I2V460_FELCA | -0.23749236 | 0.70739198 |
| 207 | A0A2I2U8W9 A0A2I2U8W9_FELCA | -0.4689799  | 0.64817985 |
| 208 | A0A2I2UXL1 A0A2I2UXL1_FELCA | -0.02707674 | 0.97024054 |
| 209 | A0A2I2U9Q8 A0A2I2U9Q8_FELCA | -0.35372991 | 0.62093985 |
| 210 | A0A2I2U9C6 A0A2I2U9C6_FELCA | 0.43543891  | 0.68076518 |
| 211 | M3W4G0 M3W4G0_FELCA         | 0.29203187  | 0.62429355 |
| 212 | A0A2I2UY31 A0A2I2UY31_FELCA | 0.24485541  | 0.6303822  |
| 213 | M3VZT0 M3VZT0_FELCA         | 0.28066303  | 0.63175032 |
| 214 | A0A337SGS6 A0A337SGS6_FELCA | -0.21434273 | 0.713302   |
| 215 | A0A2I2V0F1 A0A2I2V0F1_FELCA | 0.0269977   | 0.97111462 |
| 216 | A0A5F5XE47 A0A5F5XE47_FELCA | -0.33766502 | 0.70028922 |
| 217 | A0A2I2UJH0 A0A2I2UJH0_FELCA | 0.32258437  | 0.67086999 |
| 218 | A0A5F5XV94 A0A5F5XV94_FELCA | -0.29761638 | 0.60725388 |
| 219 | M3W584 M3W584_FELCA         | 0.16394197  | 0.80233478 |
| 220 | A0A337S3P4 A0A337S3P4_FELCA | 0.19294274  | 0.69024359 |

|     |                             |             |            |
|-----|-----------------------------|-------------|------------|
| 221 | M3WCU9 M3WCU9_FELCA         | -0.22366223 | 0.75470213 |
| 222 | M3WGN8 M3WGN8_FELCA         | 0.29436657  | 0.68817701 |
| 223 | M3W9K1 M3W9K1_FELCA         | -0.41375661 | 0.62547059 |
| 224 | Q9N2D5 G3P_FELCA            | 0.28868361  | 0.71679951 |
| 225 | A0A337SJV5 A0A337SJV5_FELCA | 0.20340093  | 0.69208425 |
| 226 | M3WFL8 M3WFL8_FELCA         | 0.26081364  | 0.6323484  |
| 227 | A0A337S498 A0A337S498_FELCA | 0.10694867  | 0.88774223 |
| 228 | M3WWI9 M3WWI9_FELCA         | 0.00561339  | 0.9923296  |
| 229 | A0A2I2UFB9 A0A2I2UFB9_FELCA | 0.2004487   | 0.81835163 |
| 230 | A0A2I2UTE6 A0A2I2UTE6_FELCA | -0.06685416 | 0.9407761  |
| 231 | M3WZA4 M3WZA4_FELCA         | 0.36516127  | 0.78176555 |
| 232 | M3W059 M3W059_FELCA         | -0.08800975 | 0.90622452 |
| 233 | M3W6M1 M3W6M1_FELCA         | 0.19046829  | 0.79644861 |
| 234 | M3WEF9 M3WEF9_FELCA         | 0.04460123  | 0.93370804 |
| 235 | A0A2I2V3D5 A0A2I2V3D5_FELCA | -0.04726234 | 0.95249919 |
| 236 | A8WA76 A8WA76_FELCA         | -0.00154657 | 0.99752947 |
| 237 | K0J107 MDHM_FELCA           | -0.09861651 | 0.84915846 |
| 238 | A0A2I2U8U0 A0A2I2U8U0_FELCA | 0.2415807   | 0.78211448 |
| 239 | M3W5T1 M3W5T1_FELCA         | -0.10418937 | 0.87296297 |
| 240 | M3XFZ1 M3XFZ1_FELCA         | -0.04177231 | 0.93146945 |
| 241 | Q66WF5 RL24_FELCA           | -0.08975336 | 0.90495434 |
| 242 | A0A5F5Y6Z4 A0A5F5Y6Z4_FELCA | -0.06822556 | 0.89754353 |
| 243 | A0A2I2ULA7 A0A2I2ULA7_FELCA | -0.13665265 | 0.80711816 |
| 244 | A0A337SMT8 A0A337SMT8_FELCA | 0.09408336  | 0.91752904 |
| 245 | M3VUG5 M3VUG5_FELCA         | -0.14139884 | 0.87214441 |
| 246 | M3WVY3 M3WVY3_FELCA         | -0.02400945 | 0.95681854 |
| 247 | M3X4F1 M3X4F1_FELCA         | 0.01954638  | 0.96919767 |
| 248 | M3W064 M3W064_FELCA         | 0.07851178  | 0.89797205 |
| 249 | M3WMZ2 M3WMZ2_FELCA         | -0.18206107 | 0.70626683 |
| 250 | M3XA07 M3XA07_FELCA         | -0.00398996 | 0.99387616 |

---

**Table S3. Detailed functional annotation of DEPs (Fig.6 Pie charts).** Upregulated proteins: A) Molecular function, B) Biological Process, and C) Cellular component. Downregulated proteins: D) Molecular function, E) Biological Process, F) Cellular component.

**A) Upregulated proteins. Molecular function GO:0003674**

|                                                                                                                                                  |    |
|--------------------------------------------------------------------------------------------------------------------------------------------------|----|
| 1. Cytoskeletal motor activity GO:0003774 (MYH9).                                                                                                | 1  |
| 2. Binding GO:0005488 (MYH9, TUFM, IGF2BP1, HNRNPH1, HSP90B1, CCT8, RPL8, RPL18, HSPA8, EZR, COX5B, EEF1A1, EEF1B2, HDLBP, RNPS1, YWHAZ, HSPA5). | 17 |
| 3. Catalytic activity GO:0003824 (PDIA4, TUFM, ATP5PF, HSP90B1, CCT8, HSPA8, EEF1A1, EEF1B2, HSPA5, ALDOA).                                      | 10 |
| 4. Translation regulator activity GO:0045182 (EEF1A1).                                                                                           | 1  |
| 5. Molecular adaptor activity GO:0060090 (IGF2BP1, TLE6).                                                                                        | 2  |
| 6. Structural molecule activity GO:0005198 (RPL8, RPL18).                                                                                        | 2  |
| 7. Molecular function regulator activity GO:0098772 (EEF1B2).                                                                                    | 1  |
| 8. ATP-dependent activity GO:0140657 (HSP90B1, CCT8, HSPA8, HSPA5).                                                                              | 4  |
| 9. Molecular sequestering activity GO:0140313 (YWHAZ).                                                                                           | 1  |
| 10. Transporter activity GO:0005215 (ATP5PF).                                                                                                    | 1  |
| 11. Transcription regulator activity GO:0140110 (TUFM, TLE6).                                                                                    | 2  |
| 12. Protein folding chaperone GO:0044183 (HSP90B1, CCT8, HSPA8, HSPA5).                                                                          | 4  |
| 13. Unassigned (BCAP31).                                                                                                                         | 1  |

**B) Upregulated proteins. Biological process GO:0008150**

|                                                                                                                                                              |    |
|--------------------------------------------------------------------------------------------------------------------------------------------------------------|----|
| 1. Cellular process GO:0009987 (PDIA4, TUFM, IGF2BP1, ATP5PF, HSP90B1, CCT8, RPL8, RPL18, HSPA8, EEF1B2, COX5B, BCAP31, EEF1A1, RNPS1, YWHAZ, HSPA5, ALDOA). | 17 |
| 2. Response to stimulus GO:0050896 (PDIA4, YWHAZ, HSPA5, IGF2BP1, HSP90B1, EEF1A1).                                                                          | 6  |
| 3. Metabolic process GO:0008152 (PDIA4, TUFM, IGF2BP1, ATP5PF, RPL8, RPL18, HSPA8, EEF1B2, COX5B, EEF1A1, RNPS1, HSPA5, ALDOA, HSP90B1, CCT8, YWHAZ).        | 16 |
| 4. Reproduction GO:0000003 (CCT8, TLE6).                                                                                                                     | 2  |
| 5. Biological regulation GO:0065007 (IGF2BP1, YWHAZ, HSPA5, TLE6, HSP90B1, CCT8, EEF1A1).                                                                    | 7  |
| 6. Developmental process GO:0032502 (IGF2BP1, YWHAZ, HSPA5, TLE6).                                                                                           | 4  |
| 7. Multicellular organismal process GO:0032501 (IGF2BP1, HSPA5).                                                                                             | 2  |
| 8. Localization GO:0051179 (IGF2BP1, HSPA8, BCAP31, HSP90B1, CCT8, YWHAZ, HSPA5).                                                                            | 7  |
| 9. Unassigned (MYH9, HNRNPH1, EZR, HDLBP).                                                                                                                   | 4  |

**C) Upregulated proteins. Cellular component GO:0005575**

|                                                                                                                    |    |
|--------------------------------------------------------------------------------------------------------------------|----|
| 1. Cytoskeleton GO:0005856 (MYH9, CCT8, EZR).                                                                      | 3  |
| 2. Extracellular region GO:0005576 (PDIA4).                                                                        | 1  |
| 3.                                                                                                                 |    |
| 4. Endoplasmic reticulum GO:0005783 (PDIA4, HSP90B1, RPL18, EEF1B2, BCAP31, HSPA5).                                | 6  |
| 5. Organelle lumen GO:0043233 (PDIA4, IGF2BP1, HNRNPH1, HSP90B1, CCT8, EEF1A1, RNPS1, HSPA5).                      | 8  |
| 6. Mitochondrion GO:0005739 (TUFM, ATP5PF, COX5B, HSPA5).                                                          | 4  |
| 7. Nucleus GO:0005634 (IGF2BP1, HNRNPH1, CCT8, HSPA8, EEF1A1, HDLBP, RNPS1, HSPA5, TLE6).                          | 9  |
| 8. Cytosol GO:0005829 (IGF2BP1, HSP90B1, CCT8, RPL8, RPL18, HSPA8, EEF1B2, YWHAZ, HSPA5).                          | 9  |
| 9. Protein-containing complex GO:0032991 (IGF2BP1, ATP5PF, HSP90B1, CCT8, RPL8, RPL18, COX5B, RNPS1, HSPA5, TLE6). | 10 |
| 10. Cell projection GO:0042995 (IGF2BP1, CCT8, HSPA8, EZR).                                                        | 4  |
| 11. non-membrane-bounded organelle GO:0043228 (IGF2BP1, RPL8, RPL18, EEF1A1).                                      | 4  |
| 12. Organelle envelope GO:0031967 (ATP5PF, COX5B).                                                                 | 2  |
| 13. Cytoplasmic vesicle GO:0031410 (HSP90B1, HSPA5).                                                               | 2  |
| 14. Vacuole GO:0005773 (HSPA8).                                                                                    | 1  |
| 15. Plasma membrane GO:0005886 (HSPA8, EZR, EEF1A1, HSPA5).                                                        | 4  |
| 16. Unassigned (ALDOA).                                                                                            | 1  |

**D) Downregulated proteins. Molecular function GO:0003674**

|                                                                                                               |    |
|---------------------------------------------------------------------------------------------------------------|----|
| 1. Catalytic activity GO:0003824 (UQCRFS1, EMG1, PLK1).                                                       | 3  |
| 2. Binding GO:0005488 (LGALS1, UQCRFS1, RPL12, TRA2B, RRP9, EMG1, PLK1, KHDC3L, H2BC3, H2BC18, GNG12, HMGA1). | 12 |
| 3. Structural molecule activity GO:0005198 (RPL12, RPS25, RPL36A, COL1A2, H2BC3, H2BC18).                     | 6  |
| 4. Antioxidant activity GO:0016209 (PRXL2A).                                                                  | 1  |
| 5. Molecular carrier activity GO:0140104 (KPNA2).                                                             | 1  |
| 6. Transcription regulator activity GO:0140110 (HMGA1).                                                       | 1  |
| 7. Transporter activity GO:0005215 (UQCRFS1).                                                                 | 1  |
| 8. Molecular adaptor activity GO:0060090 (HMGA1).                                                             | 1  |
| 9. Unassigned (COA3, PSME3IP1, YIPF3).                                                                        | 4  |

**E) Downregulated proteins. Biological process GO:0008150**

|                                                                                                                             |    |
|-----------------------------------------------------------------------------------------------------------------------------|----|
| 1. Cellular process GO:0009987 (COA3, UQCRFS1, RPL12, TRA2B, RPS25, RRP9, PRXL2A, EMG1, PLK1, KPNA2, RPL36A, GNG12, HMGA1). | 13 |
| 2. Biological regulation GO:0065007 (COA3, TRA2B, PLK1, GNG12, HMGA1).                                                      | 5  |
| 3. Metabolic process GO:0008152 (COA3, UQCRFS1, RPL12, TRA2B, RPS25, RRP9, EMG1, PLK1, RPL36A, HMGA1).                      | 10 |
| 4. Response to stimulus GO:0050896 (TRA2B, PRXL2A, PLK1, GNG12, HMGA1).                                                     | 5  |
| 5. Homeostatic process GO:0042592 (TRA2B).                                                                                  | 1  |
| 6. Developmental process GO:0032502 (TRA2B, EMG1).                                                                          | 2  |
| 7. Multicellular organismal process GO:0032501 (TRA2B, PLK1).                                                               | 2  |
| 8. Localization GO:0051179 (PLK1, KPNA2).                                                                                   | 2  |

|                                                                          |   |
|--------------------------------------------------------------------------|---|
| 9. Reproduction GO:0000003 (PLK1).                                       | 1 |
| 10. Unassigned (LGALS1, PSME3IP1, KHDC3L, H2BC3, YIPF3, H2BC18, COL1A2). | 7 |

**F) Downregulated proteins. Cellular component GO:0005575**

|                                                                                                                     |    |
|---------------------------------------------------------------------------------------------------------------------|----|
| 1. Mitochondrion GO:0005739 (COA3, UQCRFS1).                                                                        | 2  |
| 2. Organelle envelope GO:0031967 (UQCRFS1, TRA2B).                                                                  | 2  |
| 3. Protein-containing complex GO:0032991 (UQCRFS1, TRA2B, RPS25, RRP9, EMG1, KHDC3L, RPL36A, H2BC3, H2BC18, GNG12). | 10 |
| 4. Membrane GO:0016020 (PSME3IP1, YIPF3).                                                                           | 2  |
| 5. Cytosol GO:0005829 (RPL12, RPS25, H2BC3, H2BC18).                                                                | 4  |
| 6. Ribosome GO:0005840 (RPL12).                                                                                     | 1  |
| 7. Nucleus GO:0005634 (TRA2B, RRP9, EMG1, PLK1, H2BC3, H2BC18, HMGA1).                                              | 7  |
| 8. Organelle lumen GO:0043233 (TRA2B, RRP9, EMG1, H2BC3, H2BC18).                                                   | 5  |
| 9. non-membrane-bounded organelle GO:0043228 (RPS25, RRP9, EMG1, RPL36A, H2BC3, H2BC18).                            | 6  |
| 10. Cytoplasm GO:0005737 (PRXL2A).                                                                                  | 1  |
| 11. Nuclear chromosome GO:0000228 (PLK1).                                                                           | 1  |
| 12. Chromosome GO:0005694 (PLK1, HMGA1).                                                                            | 2  |
| 13. Microtubule organizing center GO:0005815 (PLK1).                                                                | 1  |
| 14. Cytoskeleton GO:0005856 (PLK1).                                                                                 | 1  |
| 15. Golgi apparatus GO:0005794 (YIPF3).                                                                             | 1  |
| 16. Cytoplasmic vesicle GO:0031410 (YIPF3).                                                                         | 1  |
| 17. Plasma membrane GO:0005886 (GNG12).                                                                             | 1  |
| 18. Unassigned (LGALS1, KPNA2, COL1A2).                                                                             | 3  |

PANTHER GO-Slim Biological Process - ZF Blastocysts

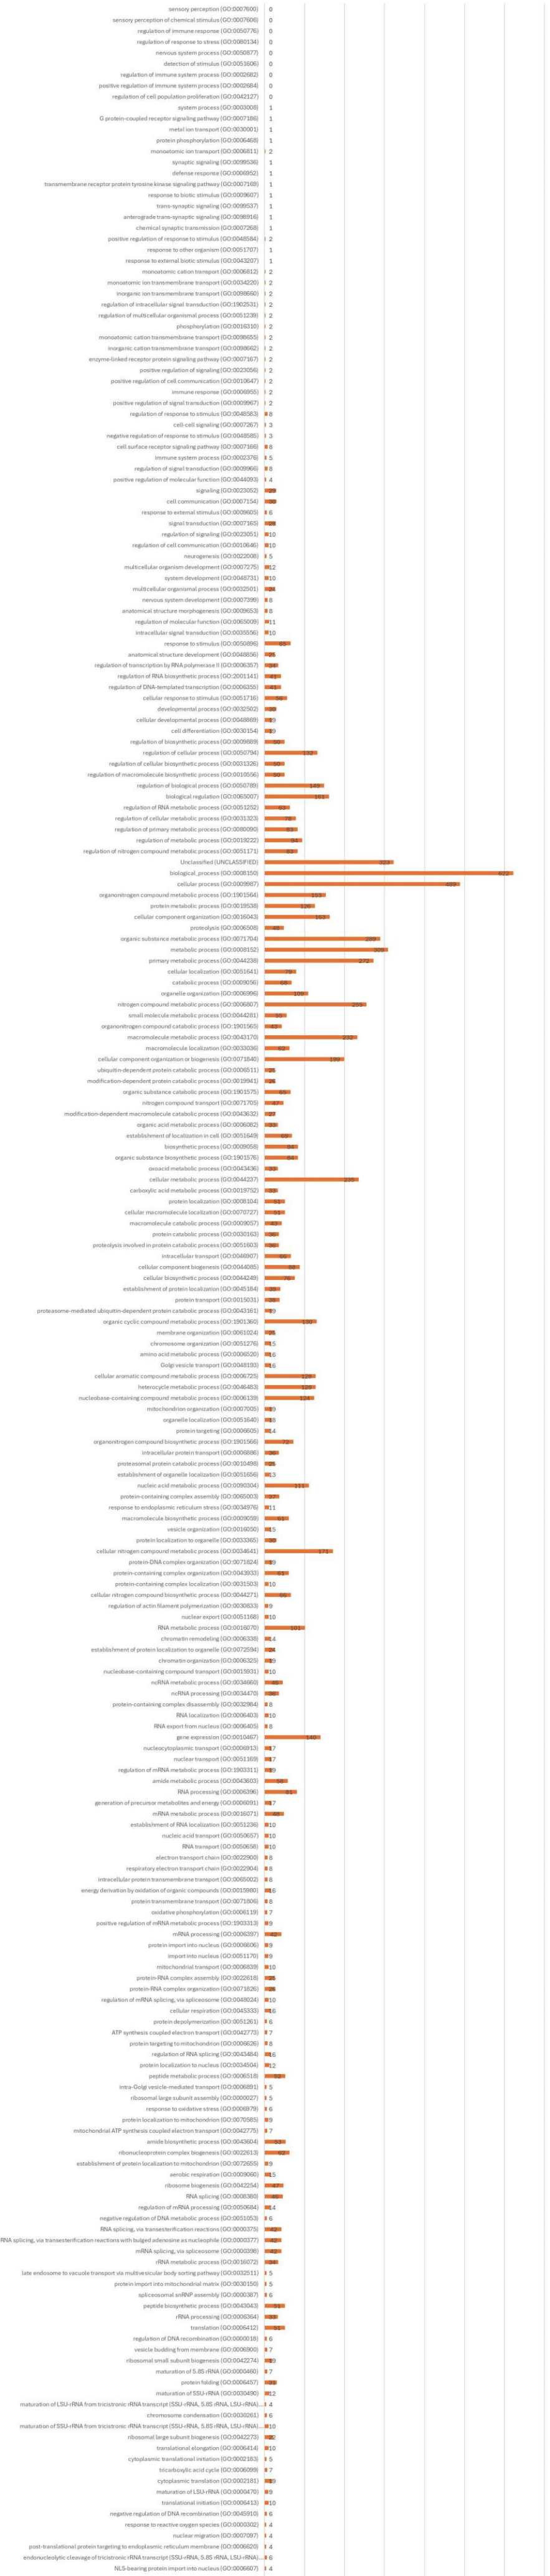

PANTHER GO-Slim Molecular Function - ZF Blastocysts

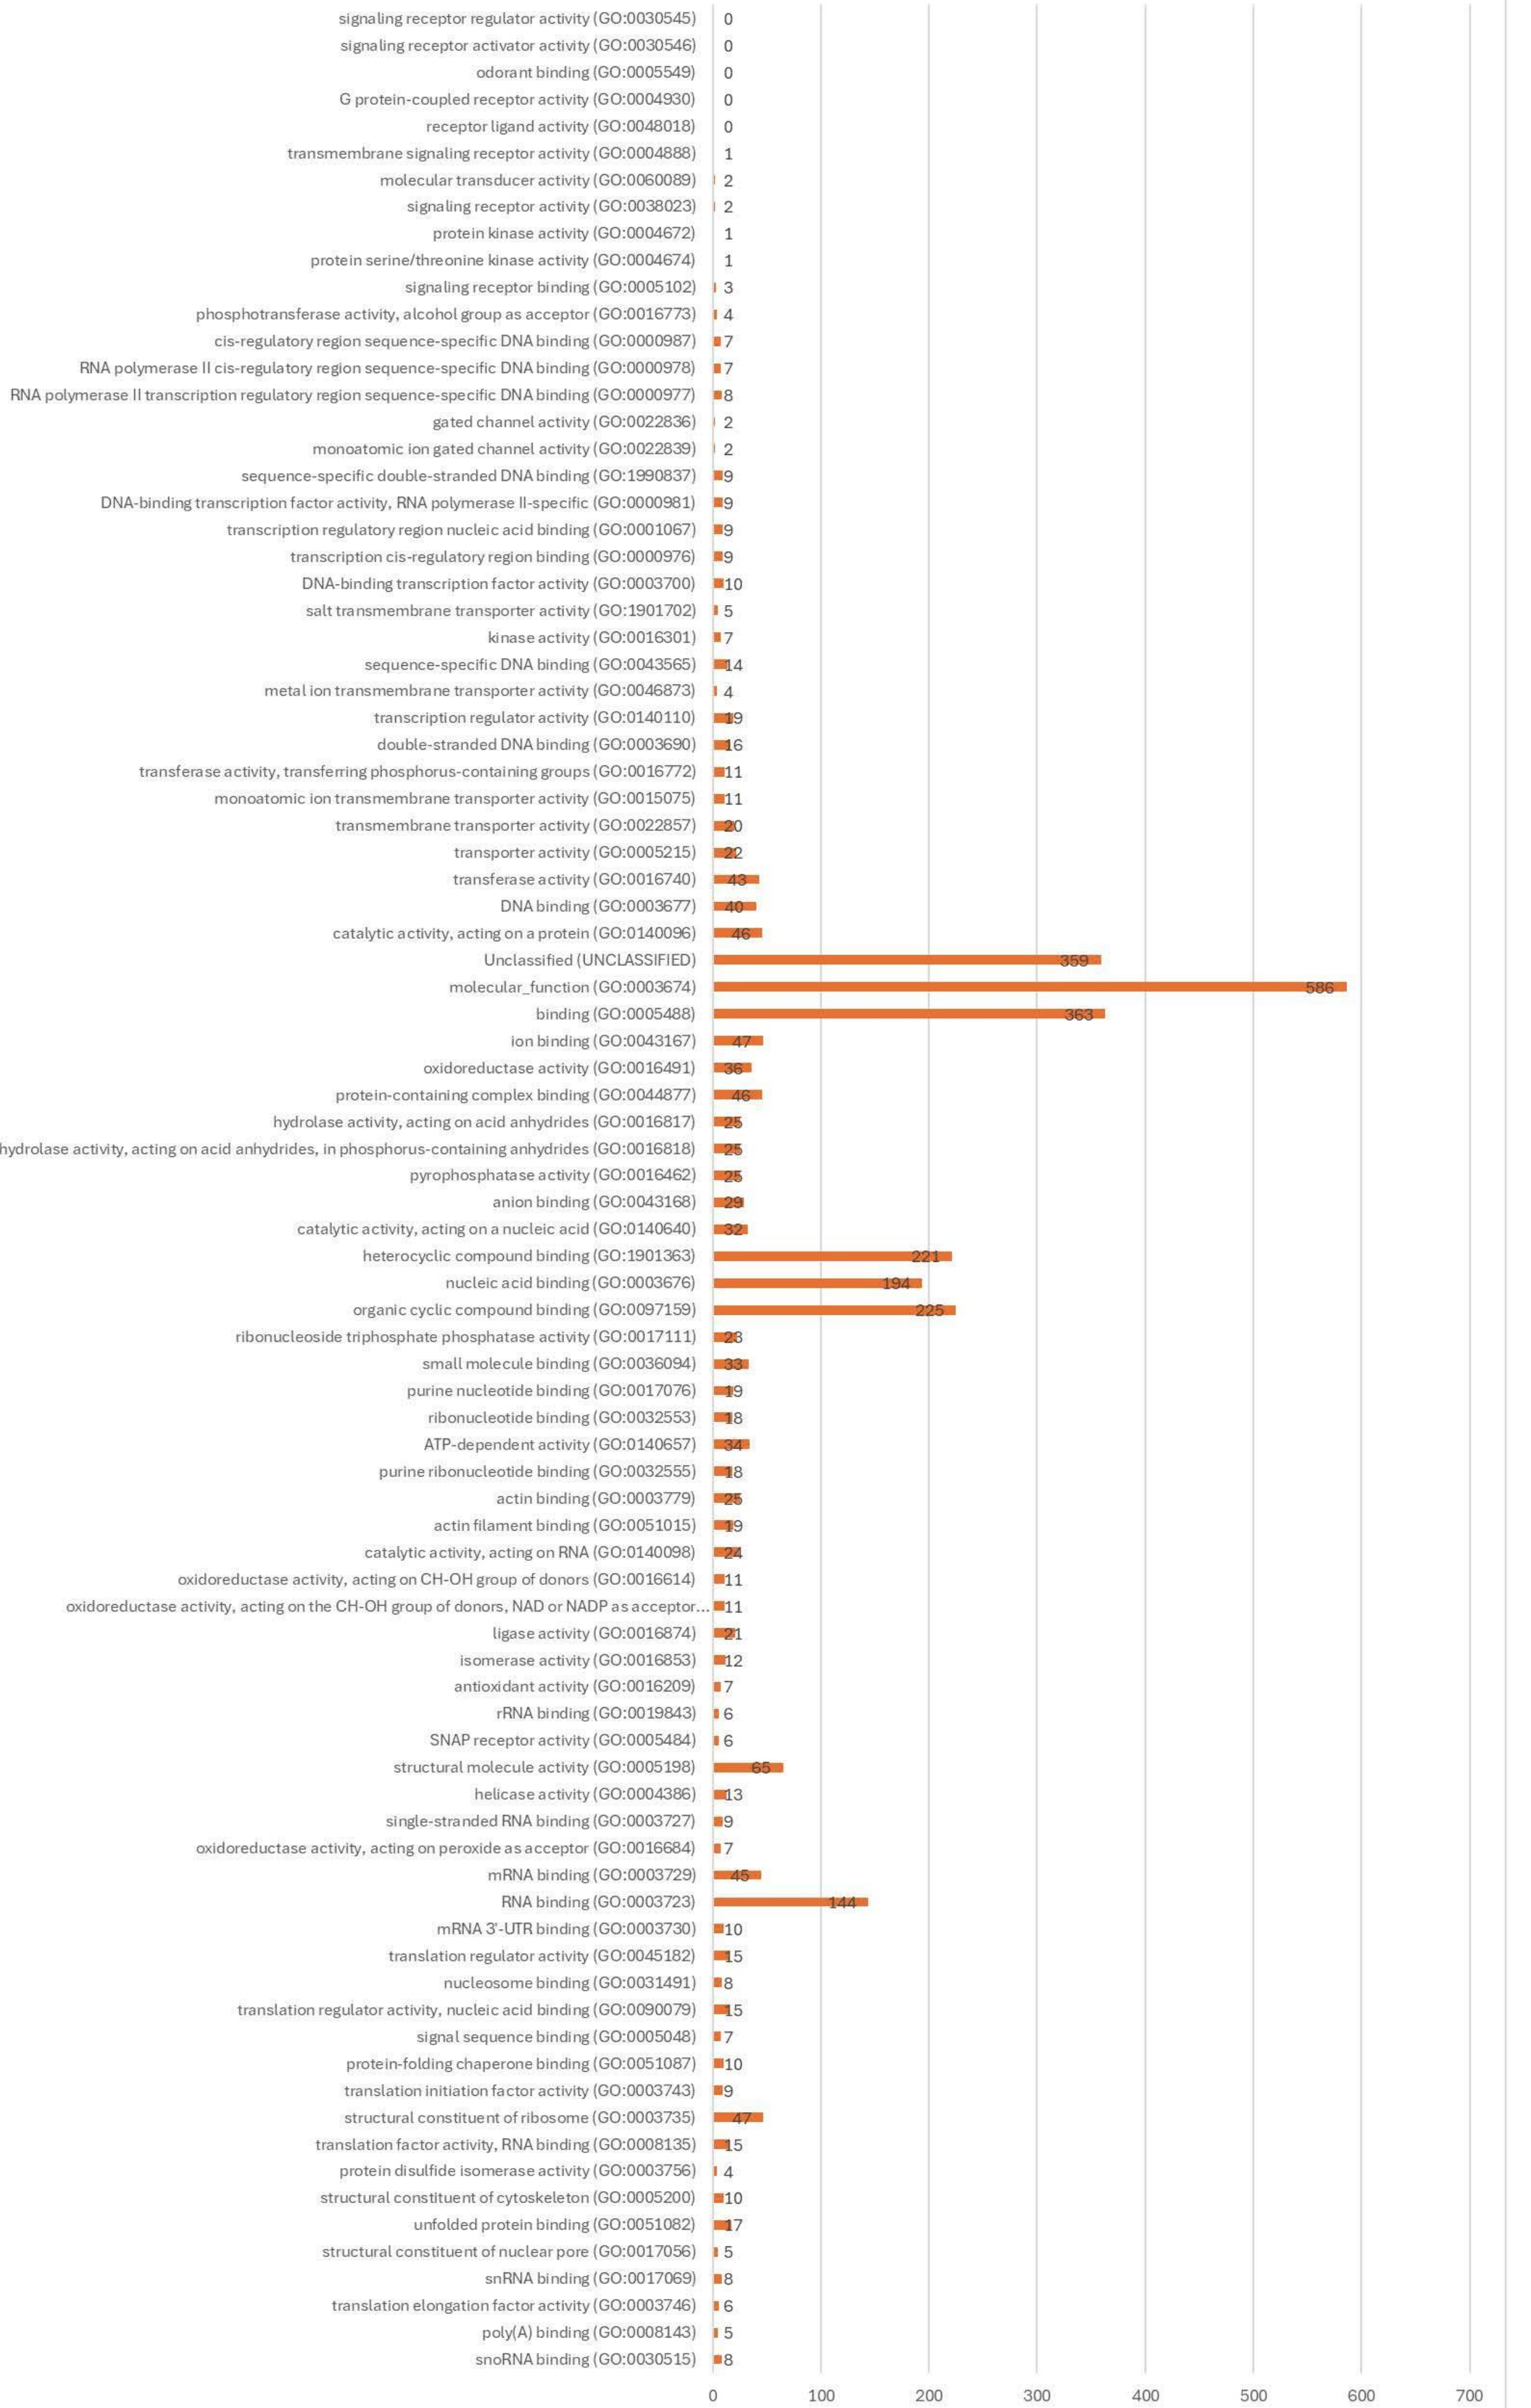

PANTHER GO-Slim Cellular Component ZF blastocysts

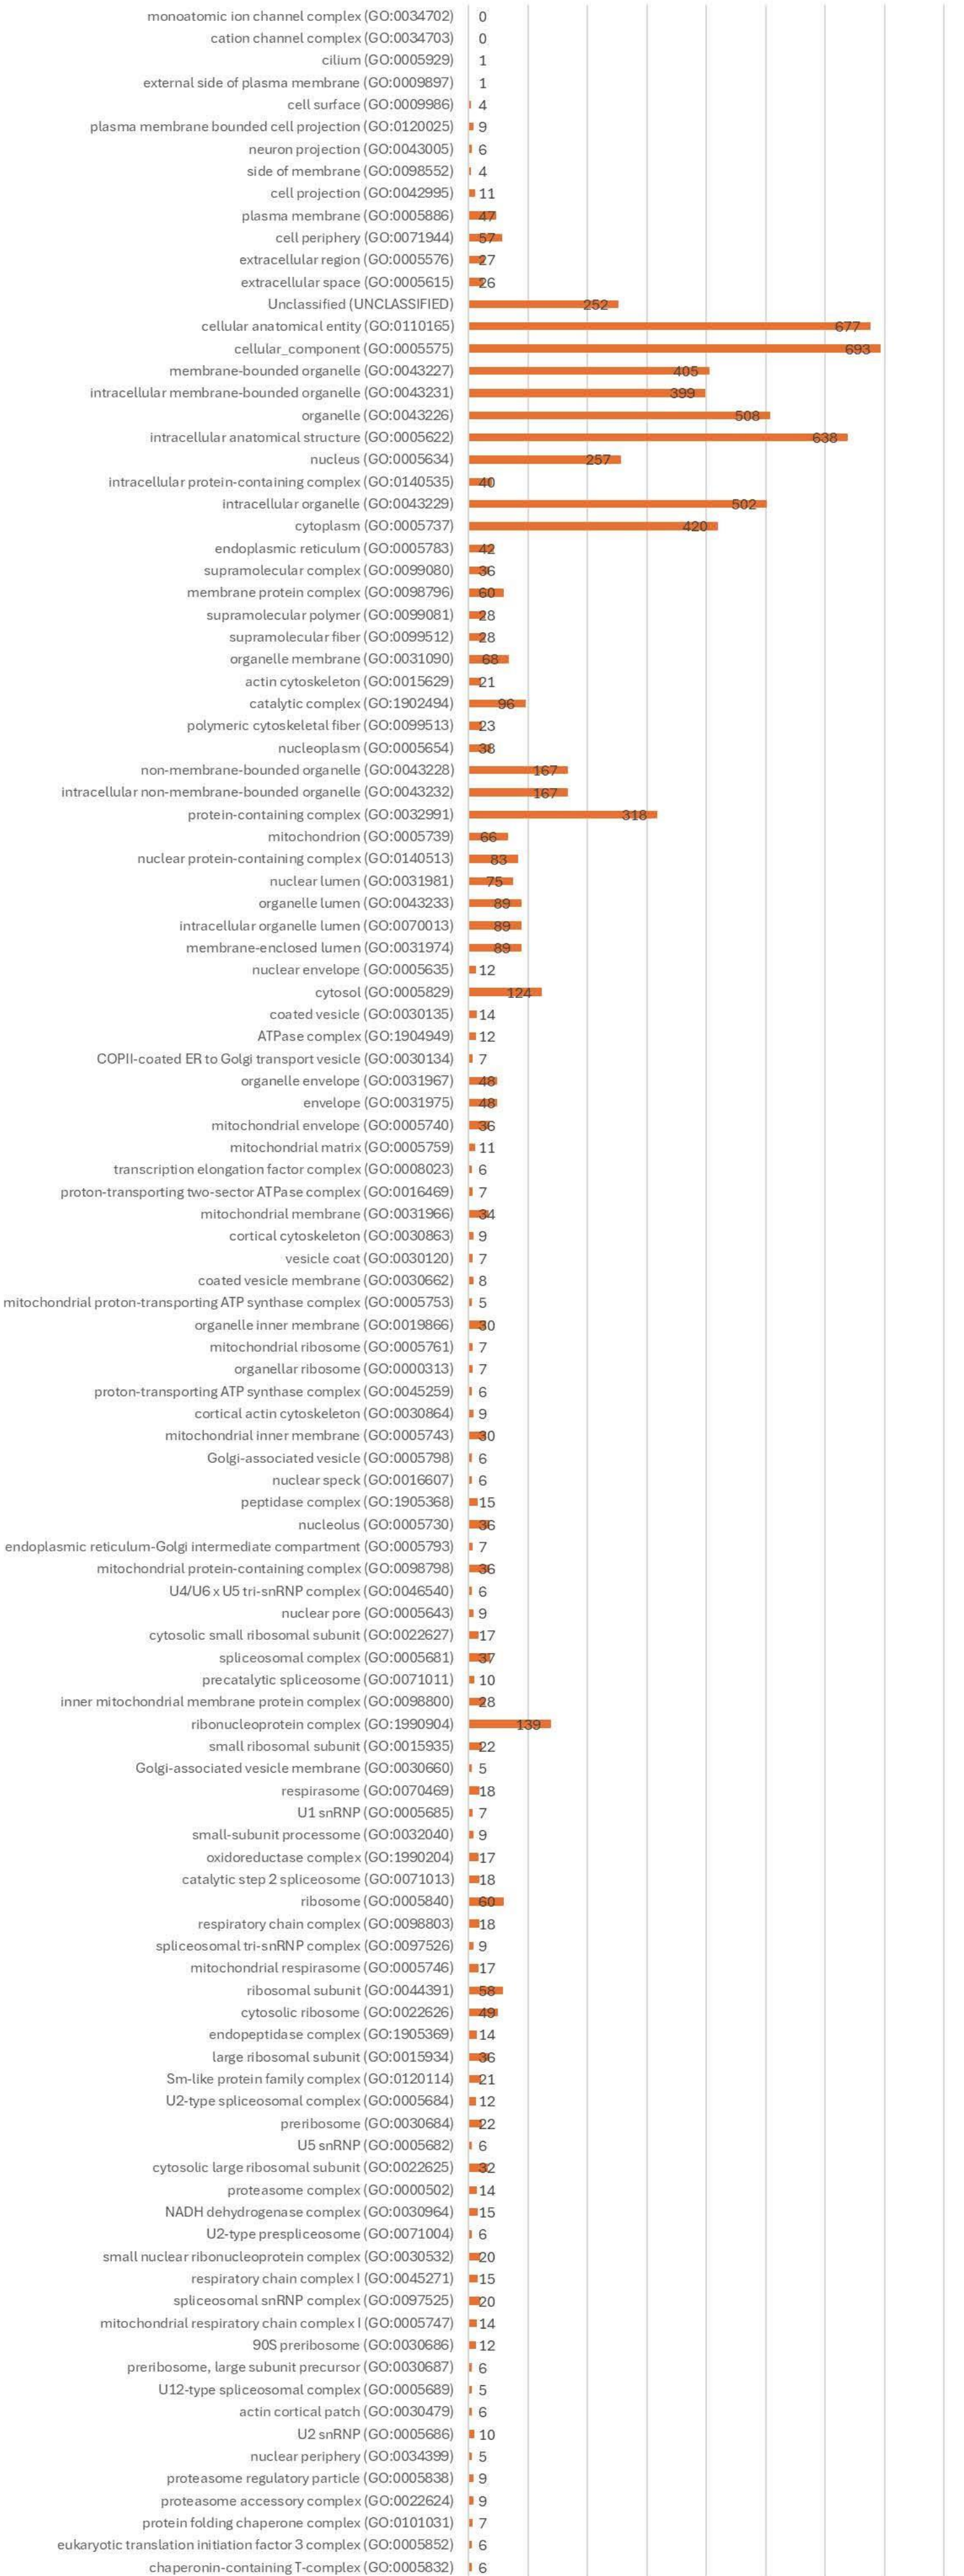

PANTHER GO-Slim Biological Process - Zl Blastocysts

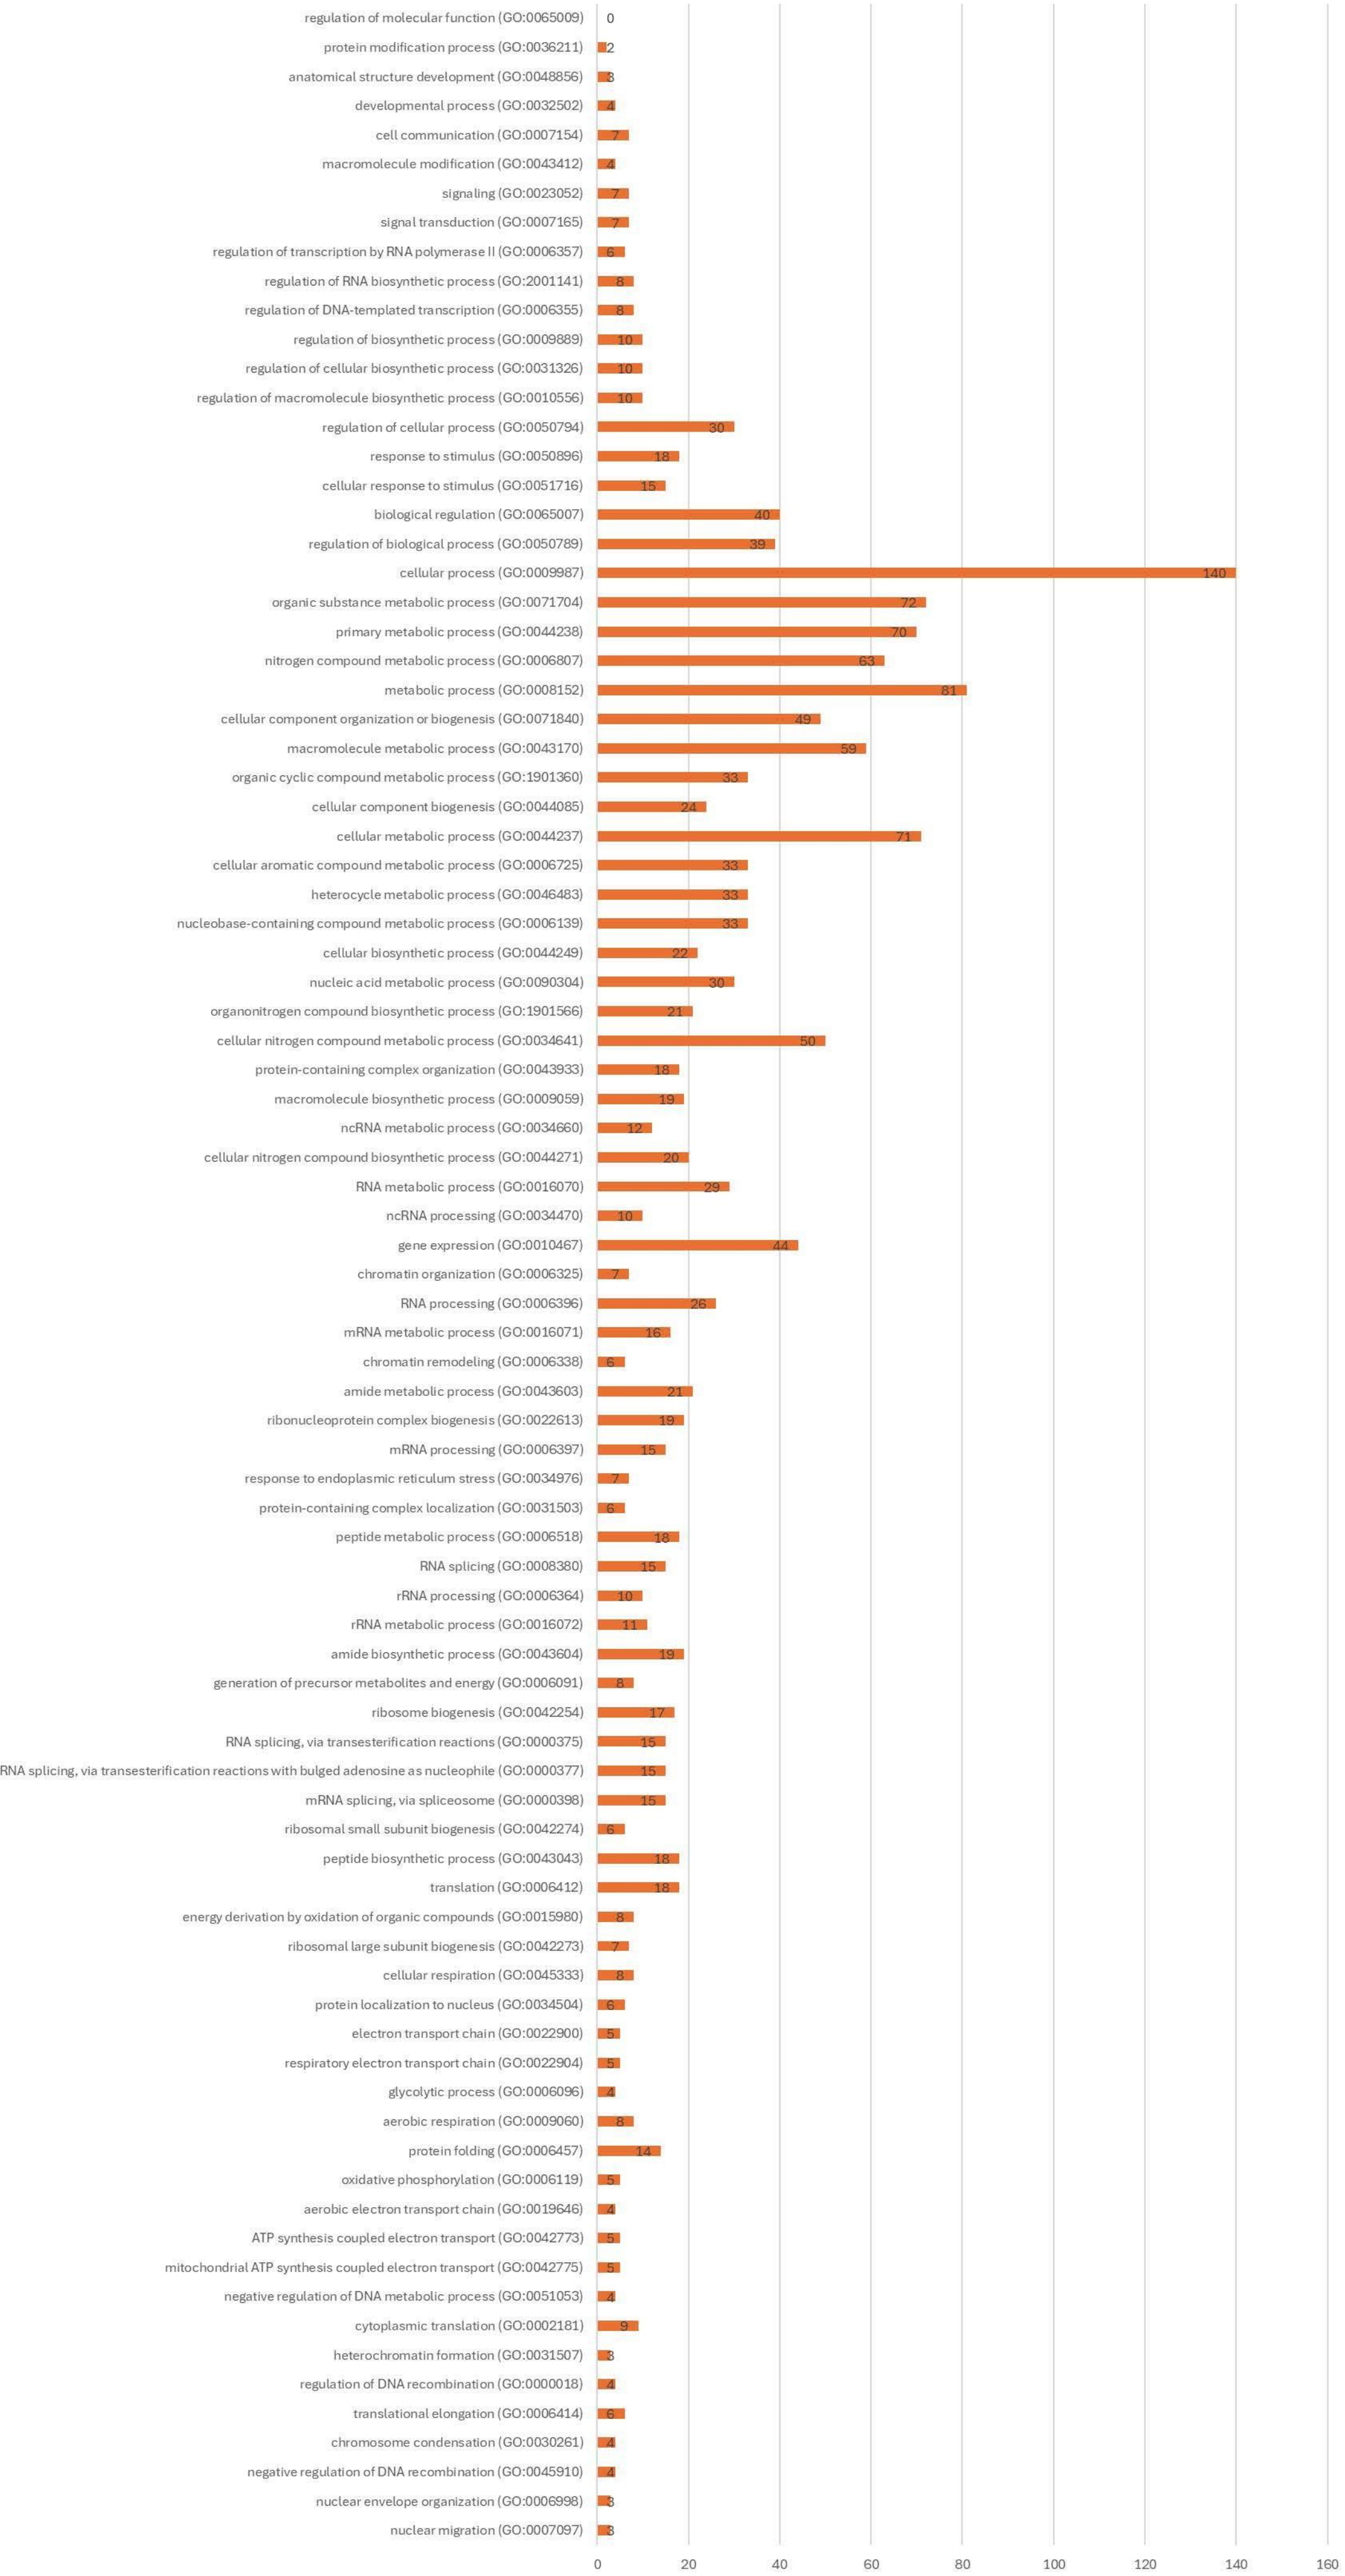

# PANTHER GO-Slim Molecular Function - ZI Blastocysts

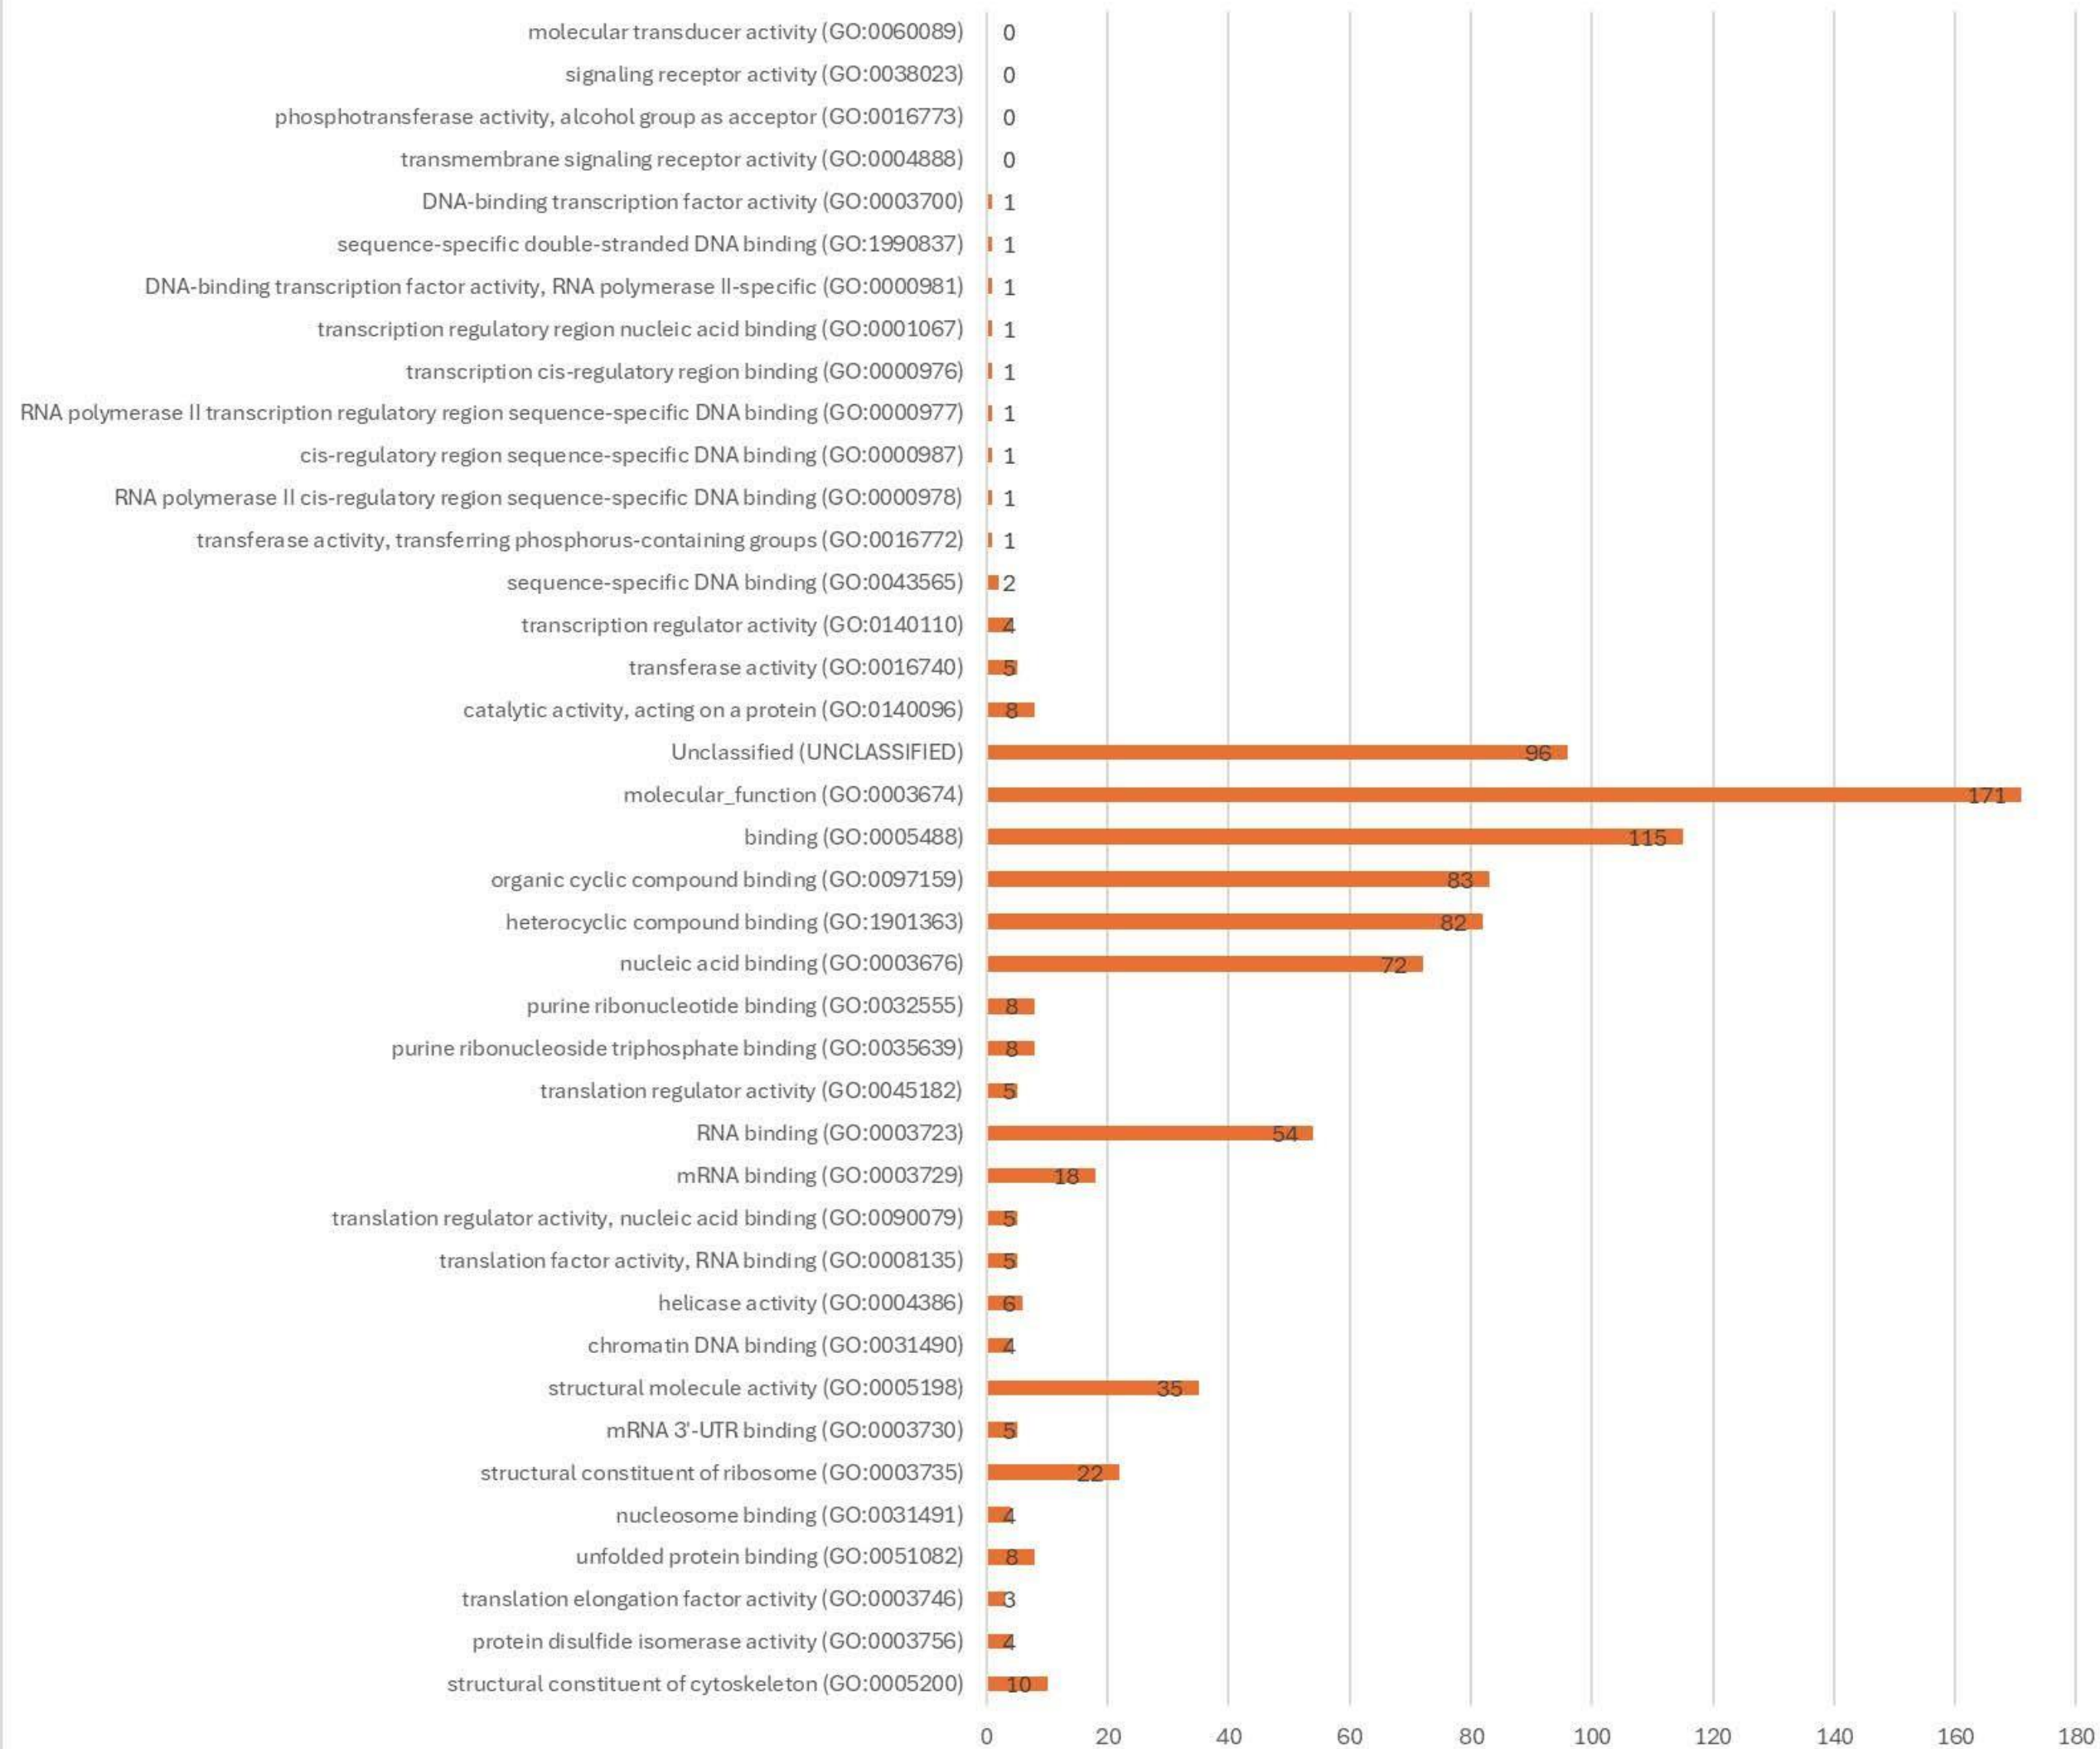

PANTHER GO-Slim Cellular Component - ZI Blastocysts

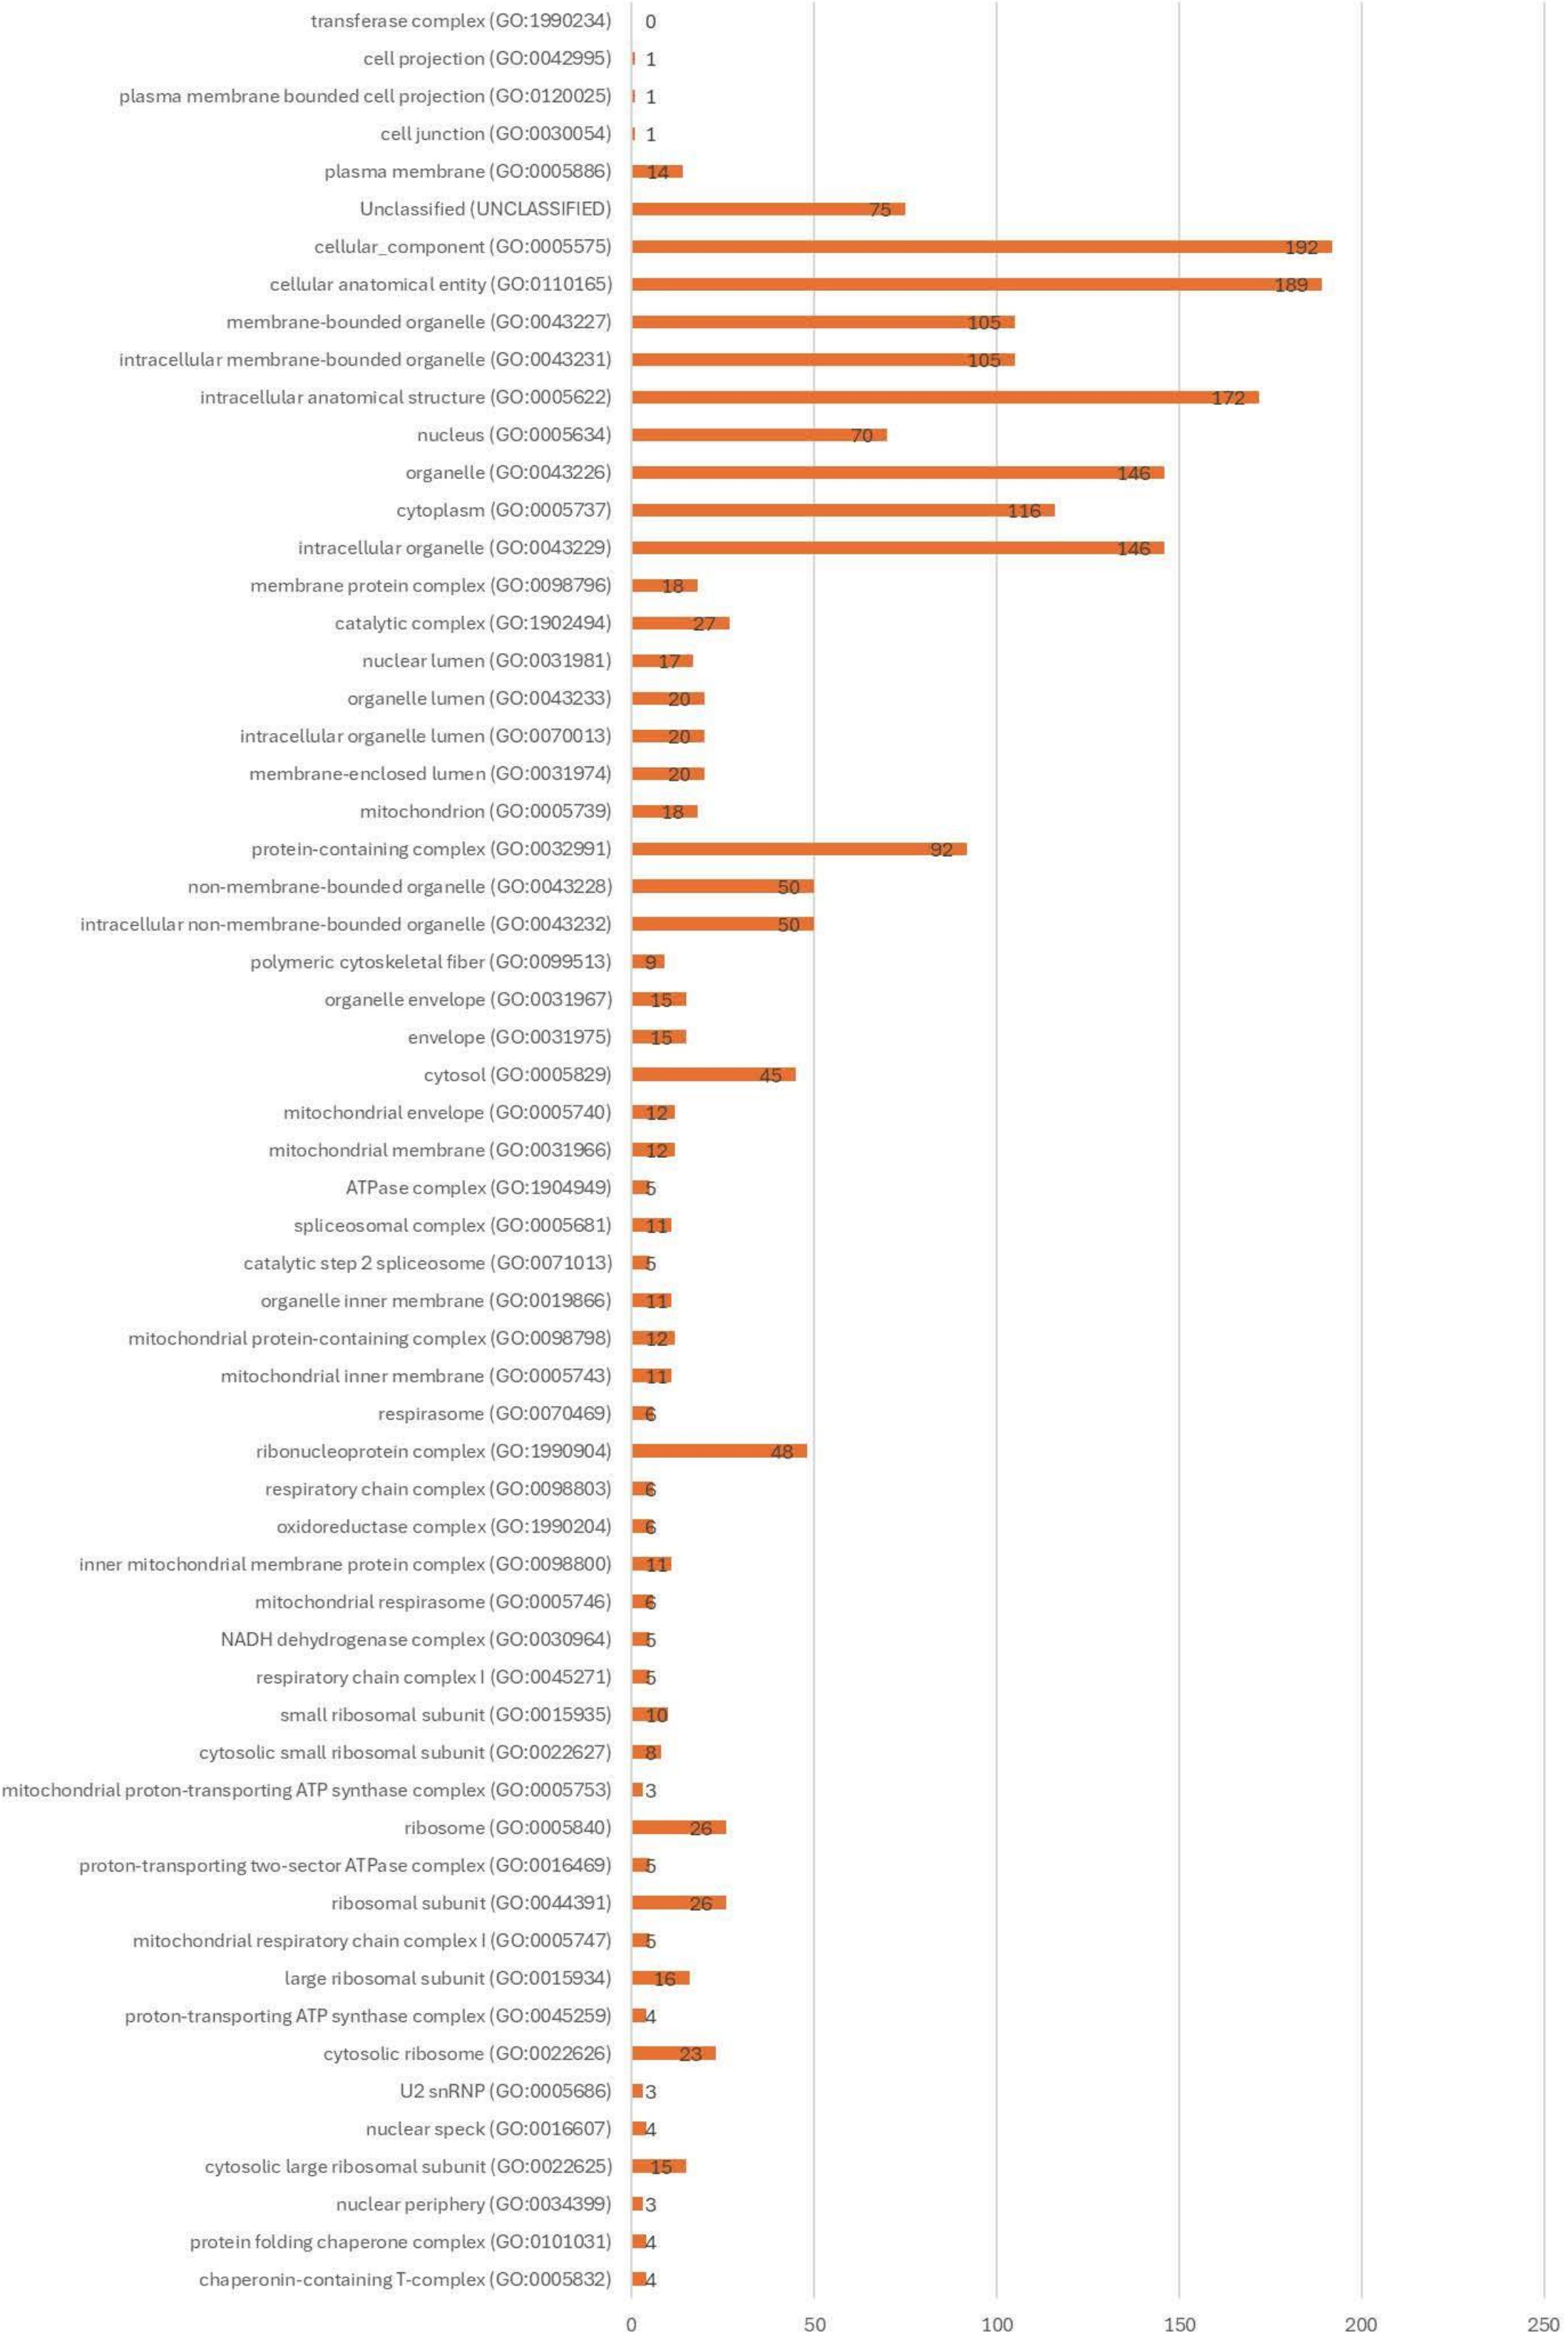

**Table S4. Proteins identified in the culture medium of blastocysts from the ZF and ZI groups.**

|    | Protein ID       | Description                                  | Name       | Group     |
|----|------------------|----------------------------------------------|------------|-----------|
| 1  | A0A5F5XYD4_FELCA | Keratin, type I cytoskeletal                 | KRT15      | ZF and ZI |
| 2  | M3VXR1_FELCA     | Keratin 10                                   | KRT10      | ZF and ZI |
| 3  | M3X1M2_FELCA     | Hemicentin 1                                 | HMCN1      | ZF and ZI |
| 4  | P49064_FELCA     | Albumin                                      | ALB        | ZF and ZI |
| 5  | A0A337S8S6_FELCA | Protease, Serine, 2 (Trypsin 2)              | TRY2       | ZF and ZI |
| 6  | A0A337SCP9_FELCA | Keratin, type I cytoskeletal 13              | KRT13      | ZF and ZI |
| 7  | M3VXK4_FELCA     | Keratin, type I cytoskeletal 17              | KRT17      | ZF and ZI |
| 8  | M3VUG7_FELCA     | Keratin 76                                   | KRT76      | ZF and ZI |
| 9  | A0A5F5XLA0_FELCA | Keratin, type I cytoskeletal 17              | KRT17      | ZF and ZI |
| 10 | M3VUF9_FELCA     | Keratin 74                                   | KRT74      | ZF and ZI |
| 11 | M3VUG8_FELCA     | Keratin 3                                    | KRT3       | ZF and ZI |
| 12 | M3VUG4_FELCA     | Intermediate filament protein                | unassigned | ZF and ZI |
| 13 | A0A2I2U8D2_FELCA | Centrosomal protein of 162 kDa               | CEP162     | ZF and ZI |
| 14 | A0A337SFR9_FELCA | GDNF family receptor alpha 3                 | GFRA3      | ZF and ZI |
| 15 | A0A5F5XDM4_FELCA | Actin beta                                   | ACTB       | ZF and ZI |
| 16 | A0A5F5XNI1_FELCA | Transferrin                                  | TF         | ZF and ZI |
| 17 | M3WLU0_FELCA     | Cathepsin B                                  | CTSB       | ZF and ZI |
| 18 | A0A5F5XLU4_FELCA | Pantetheinase                                | VNN1       | ZF and ZI |
| 19 | A0A2I2UZM2_FELCA | Heat shock protein family A (Hsp70) member 8 | HSPA8      | ZF and ZI |
| 20 | M3X9A1_FELCA     | Triosephosphate isomerase                    | TPI1       | ZF and ZI |
| 21 | M3VUU7_FELCA     | Calreticulin                                 | CALR       | ZF and ZI |
| 22 | M3WZD7_FELCA     | Belongs to the intermediate filament family  | KRT89      | ZF and ZI |
| 23 | A0A5F5XZ97_FELCA | Fatty acid-binding protein 5                 | FABP5      | ZF and ZI |
| 24 | A0A337SJA7_FELCA | Calmodulin 2                                 | CALM2      | ZF and ZI |
| 25 | A0A337S1R3_FELCA | Prothymosin alpha                            | PTMA       | ZF and ZI |
| 1  | A0A337SNF5_FELCA | Alpha-ketoglutarate-dependent dioxygenase    | FT5        | ZF        |
| 2  | A0A337S839_FELCA | Protein Mdm4                                 | MDM4       | ZF        |
| 3  | A0A337S8L1_FELCA | L-lactate dehydrogenase                      | LDHA       | ZF        |
| 4  | A0A337S103_FELCA | Metallothionein                              | MT1X       | ZF        |
| 5  | M3W8Q7_FELCA     | Glutamate dehydrogenase [NAD(P)(+)]          | GLUD1      | ZF        |
| 1  | A0A2I2USF3_FELCA | Histone H2B                                  | H2BC17     | ZI        |
| 2  | A0A5F5XCD9_FELCA | Belongs to the intermediate filament family  | KRT86      | ZI        |
| 3  | A0A337SCD2_FELCA | Annexin                                      | ANXA2      | ZI        |
| 4  | A0A2I2UBN8_FELCA | Junction plakoglobin                         | JUP        | ZI        |
| 5  | M3W114_FELCA     | Proteolipid protein 2                        | PLP2       | ZI        |
| 6  | A0A2I2UGZ3_FELCA | Keratin 32                                   | KRT32      | ZI        |
| 7  | A0A5F5XSP5_FELCA | Leucine aminopeptidase 3                     | LAP3       | ZI        |
| 8  | M3W2I5_FELCA     | Plakophilin 1                                | PKP1       | ZI        |
| 9  | M3WCK3_FELCA     | Desmoplakin                                  | DSP        | ZI        |
| 10 | M3VUF5_FELCA     | Keratin 82                                   | KRT82      | ZI        |
| 11 | M3W584_FELCA     | H1.5 linker histone, cluster member          | H1-5       | ZI        |
| 12 | A0A5K1VP01_FELCA | Lamin A/C                                    | LMNA       | ZI        |

|    |                  |                                    |      |    |
|----|------------------|------------------------------------|------|----|
| 13 | A0A337SS59_FELCA | Sad1 and UNC84 domain containing 2 | SUN2 | ZI |
| 14 | A0A2I2U7V8_FELCA | Four and a half LIM domains 1      | FHL1 | ZI |

---

**Figure S5. GO annotation of the proteins identified in the culture medium of ZF and ZI blastocysts.**

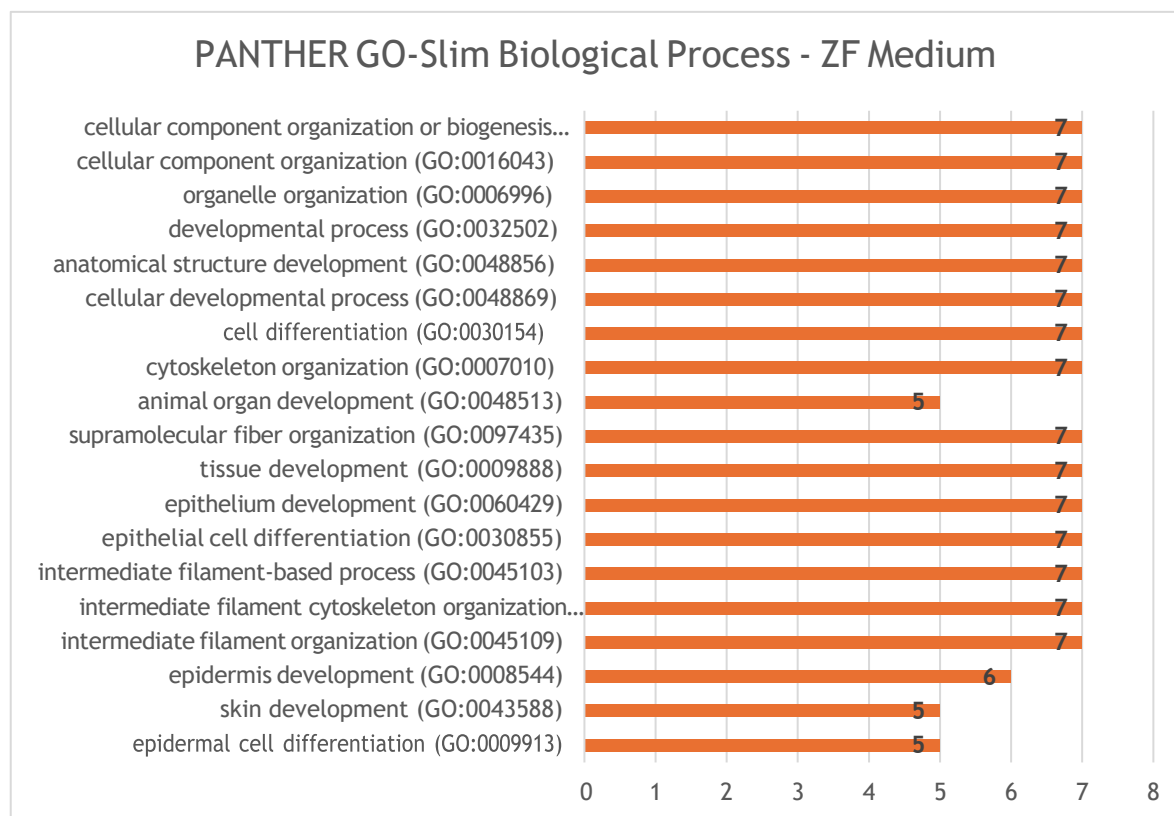

**S5.1. GO Biological Process annotation of all the proteins identified in the medium samples of ZF Blastocysts. The PANTHER18.0 Classification System was used for analysis.**

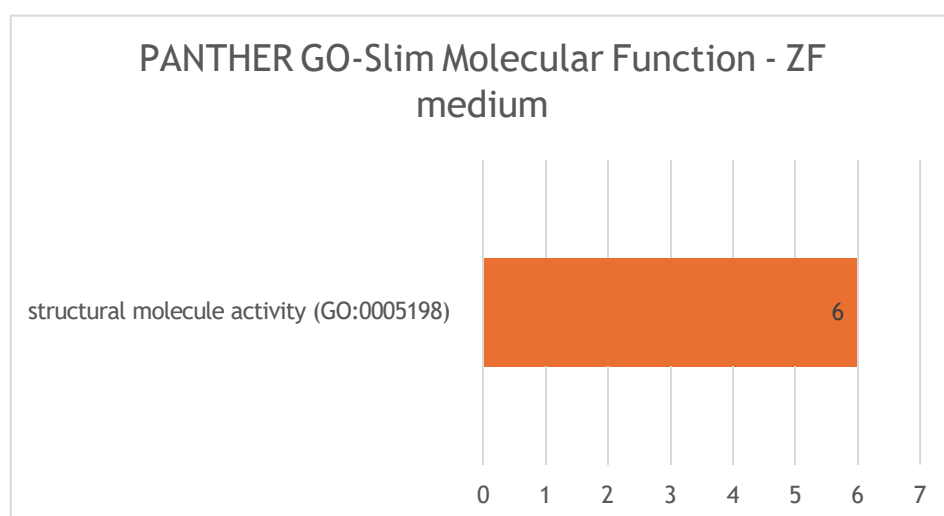

**S5.2. GO Molecular Function annotation of all the proteins identified in the medium samples of ZF Blastocysts. The PANTHER18.0 Classification System was used for analysis.**

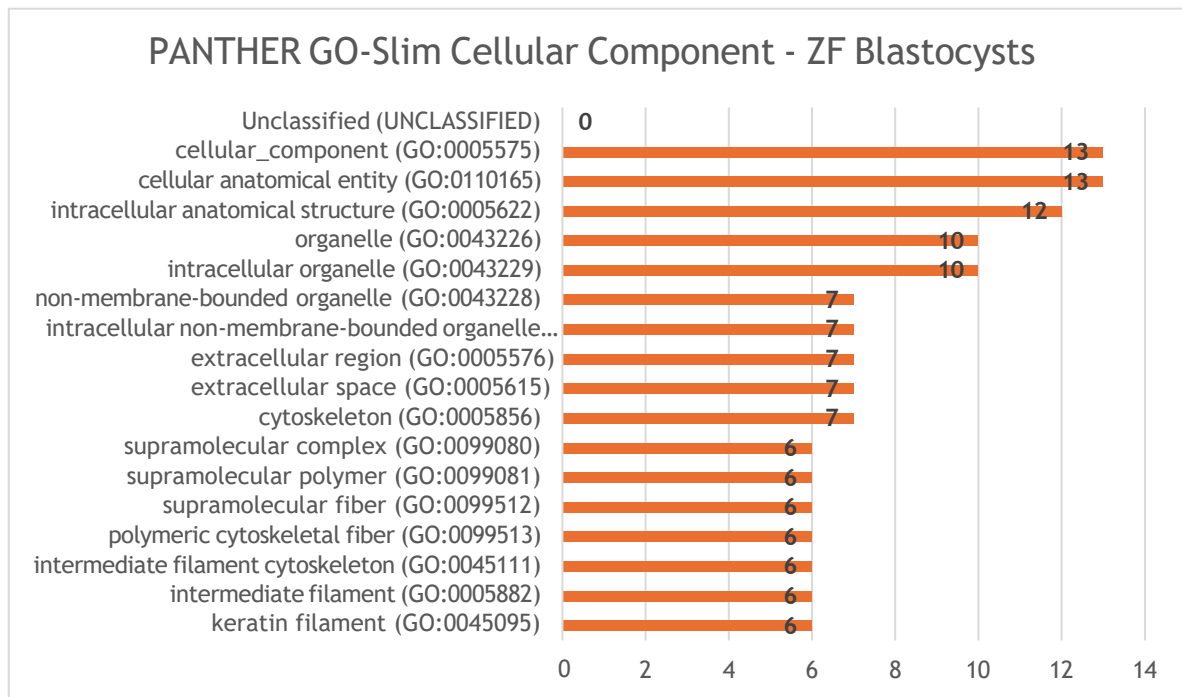

**S5.3.** GO Cellular Component annotation of all the proteins identified in the medium samples of ZF Blastocysts. The PANTHER18.0 Classification System was used for analysis.

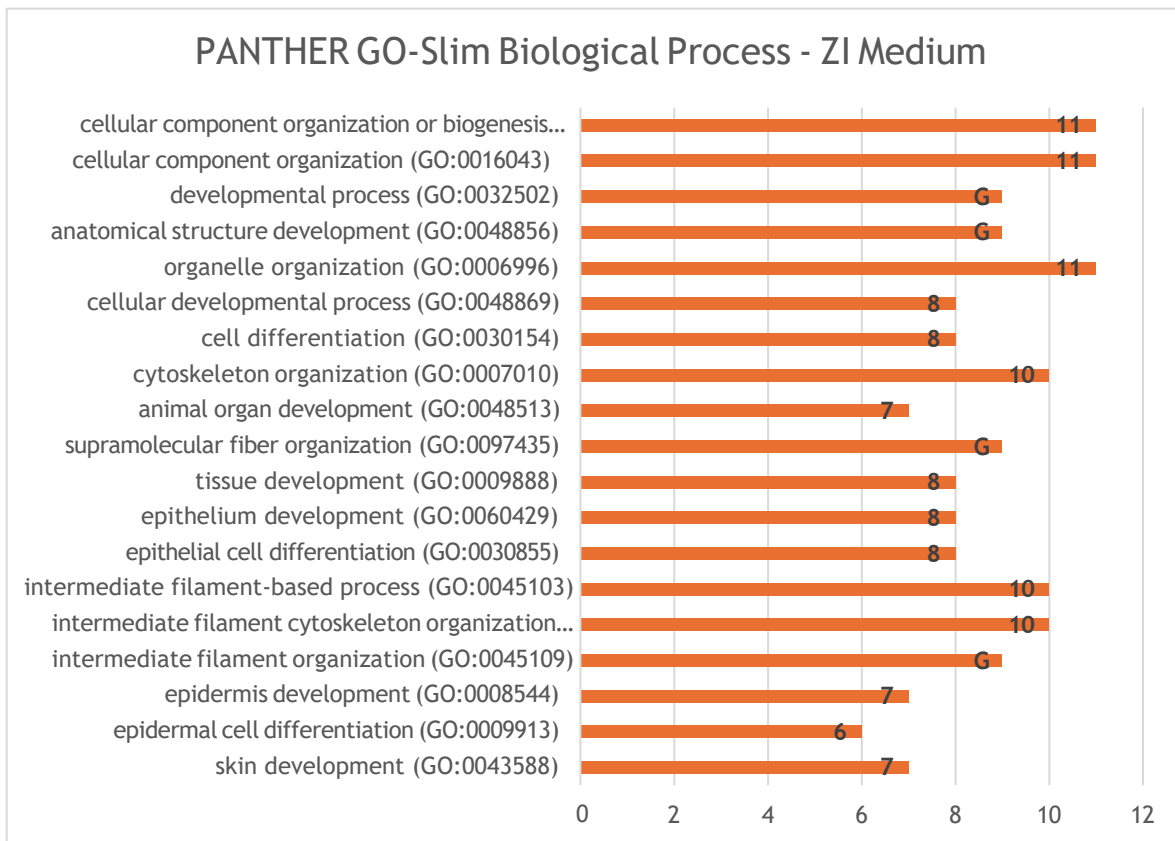

**S5.4.** GO Biological Process annotation of all the proteins identified in the medium samples of ZI Blastocysts. The PANTHER18.0 Classification System was used for analysis.

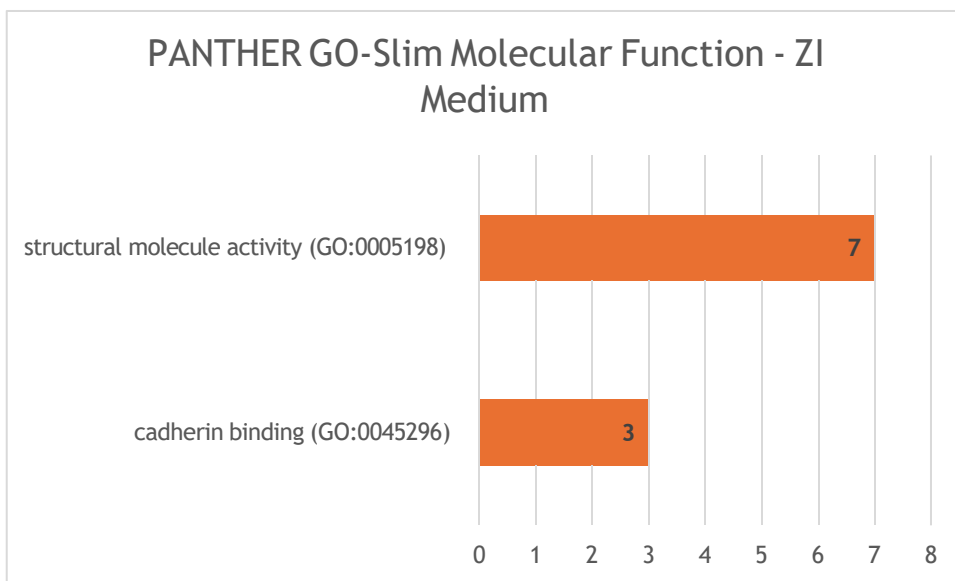

**S5.5.** GO Molecular Function annotation of all the proteins identified in the medium samples of ZI Blastocysts. The PANTHER18.0 Classification System was used for analysis.

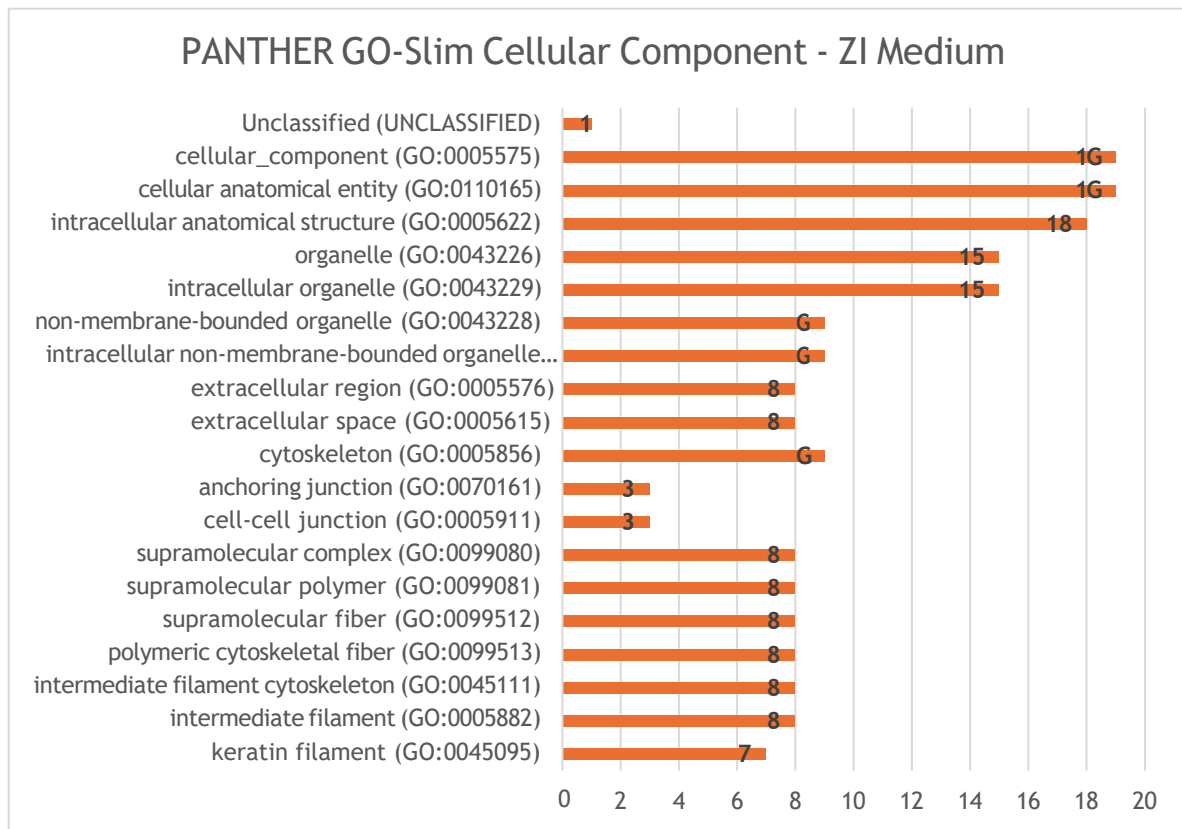

**S5.6.** GO Cellular Component annotation of all the proteins identified in the medium samples of ZI Blastocysts. The PANTHER18.0 Classification System was used for analysis.

**Table S6. Detailed functional annotation of DEPs (Fig.8 Pie charts).** Proteins identified in the culture medium of ZF blastocysts (A, B, and C), ZI blastocysts (D, E, and F), and proteins shared between the conditioned medium of ZF and ZI blastocysts (G, H, and I).

|                                                                   |  |   |
|-------------------------------------------------------------------|--|---|
| <b>A) ZF-medium. Molecular function GO:0003674</b>                |  |   |
| 1. Binding GO:0005488 (FT5, MDM4, MT1X).                          |  | 3 |
| 2. Catalytic activity GO:0003824 (FT5, LDHA, GLUD1).              |  | 3 |
| <b>B) ZF-medium. Biological process GO:0008150</b>                |  |   |
| 1. Metabolic process GO:0008152 (FT5, LDHA, GLUD1).               |  | 3 |
| 2. Cellular process GO:0009987 (FT5, MDM4, LDHA, GLUD1).          |  | 4 |
| 3. Response to stimulus GO:0050896 (FT5).                         |  | 1 |
| 4. Biological regulation GO:0065007 (FT5, MDM4).                  |  | 2 |
| 5. Developmental process GO:0032502 (FT5).                        |  | 1 |
| 6. Growth GO:004007 (FT5).                                        |  | 1 |
| 7. Localization GO:0051179 (GLUD1).                               |  | 1 |
| 8. Unassigned (MT1X).                                             |  | 1 |
| <b>C) ZF-medium. Cellular component GO:0005575</b>                |  |   |
| 1. Cytoplasm GO:0005737 (FT5).                                    |  | 1 |
| 2. Nucleoplasm GO:0005654 (FT5).                                  |  | 1 |
| 3. Nucleus GO:0005634 (MDM4).                                     |  | 1 |
| 4. Mitochondrion GO:0005739 (LDHA, GLUD1).                        |  | 2 |
| 5. Organelle lumen GO:0043233 (GLUD1).                            |  | 1 |
| 6. Unassigned (MT1X).                                             |  | 1 |
| <b>D) ZI-medium. Molecular function GO:0003674</b>                |  |   |
| 1. Binding GO:0005488 (H2BC17, ANXA2, JUP, PKP1, H1-5, FHL1).     |  | 6 |
| 2. Structural molecule activity GO:0005198 (KRT86, KRT32, KRT82). |  | 3 |
| 3. Molecular function regulator activity GO:0098772 (ANXA2).      |  | 1 |
| 4. Transporter activity GO:0005198 (ANXA2).                       |  | 1 |
| 5. Transcription regulator activity GO:0140110 (JUP).             |  | 1 |
| 6. Catalytic activity GO:0003824, (LAP3).                         |  | 1 |
| 7. Unassigned (PLP2, DSP, LMNA, SUN2).                            |  | 4 |

**E) ZI-medium. Biological process GO:0008150**

|                                                                |   |
|----------------------------------------------------------------|---|
| 1. Biological regulation GO:0065007 (JUP, H1-5).               | 2 |
| 2. Cellular process GO:0009987 (JUP, PKP1, DSP, KRT82, H1-5).  | 5 |
| 3. Response to stimulus GO:0050896 (JUP).                      | 1 |
| 4. Metabolic process GO:0008152 (LAP3).                        | 1 |
| 5. Developmental process GO:0032502 (DSP, KRT82, FHL1).        | 3 |
| 6. Multicellular organismal process GO:0032501 (KRT82).        | 1 |
| 7. Unassigned (H2BC17, KRT86, ANXA2, PLP2, KRT32, LMNA, SUN2). | 7 |

**F) ZI-medium. Cellular component GO:0005575**

|                                                                     |   |
|---------------------------------------------------------------------|---|
| 1. Nucleus GO:0005634 (H2BC17, ANXA2, JUP, PKP1, H1-5, LMNA).       | 6 |
| 2. Protein-containing complex GO:0032991 (H2BC17, ANXA2, H1-5).     | 3 |
| 3. non-membrane-bounded organelle GO:0043228 (H2BC17, ANXA2, H1-5). | 3 |
| 4. Cytoskeleton GO:0005856 (KRT86, JUP, KRT32, KRT82, LMNA, DSP).   | 6 |
| 5. Extracellular region GO:0005576 (ANXA2).                         | 1 |
| 6. Endosome GO:0005768 (ANXA2).                                     | 1 |
| 7. Vacuole GO:0005773 (ANXA2).                                      | 1 |
| 8. Cytosol GO:0005829 (ANXA2, JUP, LAP3).                           | 3 |
| 9. Plasma membrane GO:0005886 (ANXA2, JUP, PKP1, DSP).              | 4 |
| 10. Organelle GO:0043226 (JUP).                                     | 1 |
| 11. Membrane GO:0016020 (PLP2, SUN2).                               | 2 |
| 12. Nucleoplasm GO:0005635 (PKP1).                                  | 1 |
| 13. Organelle lumen GO:0043233 (H1-5).                              | 1 |
| 14. Nuclear envelope GO:0005635 (LMNA).                             | 1 |
| 15. Unassigned (FLH1).                                              | 1 |

**G) ZF and ZI medium. Molecular function GO:0003674**

|                                                                                                                   |    |
|-------------------------------------------------------------------------------------------------------------------|----|
| 1. Structural molecule activity GO:0005198 (KRT15, KRT10, KRT13, KRT17, KRT76, KRT74, KRT3, LOC101097497, KRT89). | 10 |
| 2. Binding GO:0005488 (KRT10, HMCN1, ALB, ACTB, CTSB, HSPA8, TPI1, CALR, FABP5, CALM2, PTMA).                     | 11 |
| 3. Catalytic activity GO:0003824 (TRY2, CTSB, VNN1, HSPA8, TPI1).                                                 | 5  |
| 4. Molecular transducer activity GO:0060089 (GFRA3).                                                              | 1  |
| 5. ATP-dependent activity GO:0140657 (HSPA8).                                                                     | 1  |
| 6. Protein folding chaperone GO:0044183 (HSPA8).                                                                  | 1  |
| 7. Molecular carrier activity GO:0140104 (CALR).                                                                  | 1  |
| 8. Unassigned (CEP162, TF).                                                                                       | 2  |

**H) ZF and ZI medium. Biological process GO:0008150**

|                                                                                                                                            |    |
|--------------------------------------------------------------------------------------------------------------------------------------------|----|
| 1. Cellular process GO:0009987 (KRT10, HMCN1, ALB, KRT13, KRT76, KRT74, KRT3, LOC101097497, CEP162, CTSB, HSPA8, TPI1, CALR, KRT89, PTMA). | 15 |
| 2. Metabolic process GO:0008152 (TRY2, CTSB, VNN1, HSPA8, TPI1, CALR, PTMA).                                                               | 7  |
| 3. Developmental process GO:0032502 (KRT10, KRT13, KRT76, KRT74, KRT3, LOC101097497, CTSB, CALR, KRT89).                                   | 9  |
| 4. Response to stimulus GO:0050896 (HMCN1, ALB, KRT13, CTSB, CALR).                                                                        | 5  |
| 5. Biological regulation GO:0065007 (ALB, KRT13, KRT74, CALR, PTMA).                                                                       | 5  |
| 6. Multicellular organismal process GO:0032501 (KRT74, LOC101097497, CTSB, CALR).                                                          | 4  |
| 7. Reproduction GO:0000003 (CTSB, CALR).                                                                                                   | 2  |
| 8. Localization GO:0051179 (HSPA8, CALR).                                                                                                  | 2  |
| 9. Immune system process GO:0002376 (CALR).                                                                                                | 1  |
| 10. Unassigned (KRT15, KRT17, GFRA3, ACTB, TF, FABP5, CALM2).                                                                              | 7  |

**I) ZF and ZI medium. Cellular component GO:0005575**

|                                                                                                           |    |
|-----------------------------------------------------------------------------------------------------------|----|
| 1. Cytoskeleton GO:0005856 (KRT15, KRT10, KRT13, KRT17, KRT76, KRT74, KRT3, LOC101097497, CEP162, KRT89). | 10 |
| 2. Cytoplasm GO:0005737 (KRT10, ALB, KRT74, CEP162, FABP5).                                               | 5  |
| 3. Plasma membrane GO:0005886 (KRT10, KRT74, GFRA3, CTSB, HSPA8, CALR).                                   | 6  |
| 4. Extracellular region GO:0005576 (HMCN1, CTSB, FABP5).                                                  | 3  |
| 5. Extracellular matrix GO:0031012 (HMCN1).                                                               | 1  |
| 6. Extracellular space GO:0005615 (ALB, TF, CALR).                                                        | 3  |
| 7. Protein-containing complex GO:0032991 (ALB, CTSB).                                                     | 2  |
| 8. Microtubule organizing center GO:0005815 (CEP162).                                                     | 1  |
| 9. Vacuole GO:0005773 (CTSB, HSPA8).                                                                      | 2  |
| 10. Cellular anatomical entity GO:0110165 (VNN1).                                                         | 1  |
| 11. Nucleus GO:0005634 (HSPA8, PTMA).                                                                     | 2  |
| 12. Cytosol GO:0005829 (HSPA8, TPI1, CALR, PTMA).                                                         | 4  |
| 13. Cell projection GO:0042995 (HSPA8).                                                                   | 1  |
| 14. Nuclear envelope GO:0005635 (CALR).                                                                   | 1  |
| 15. Endoplasmic reticulum GO:0005783 (CALR).                                                              | 1  |
| 16. Unassigned (TRY2, ACTB, CALM2).                                                                       | 3  |
